# Supplementary material for: Regional Disparities in the Social Determinants of Stroke Severity
Source: Research Square preprint supplement (doi:10.21203/rs.3.rs-6815244/v1), 2025-06-25
Supplement: Supplementary file 1 [file fc7166fd3d19c6fb4521c0cb.docx]

**SUPPLEMENTARY MATERIALS**

| 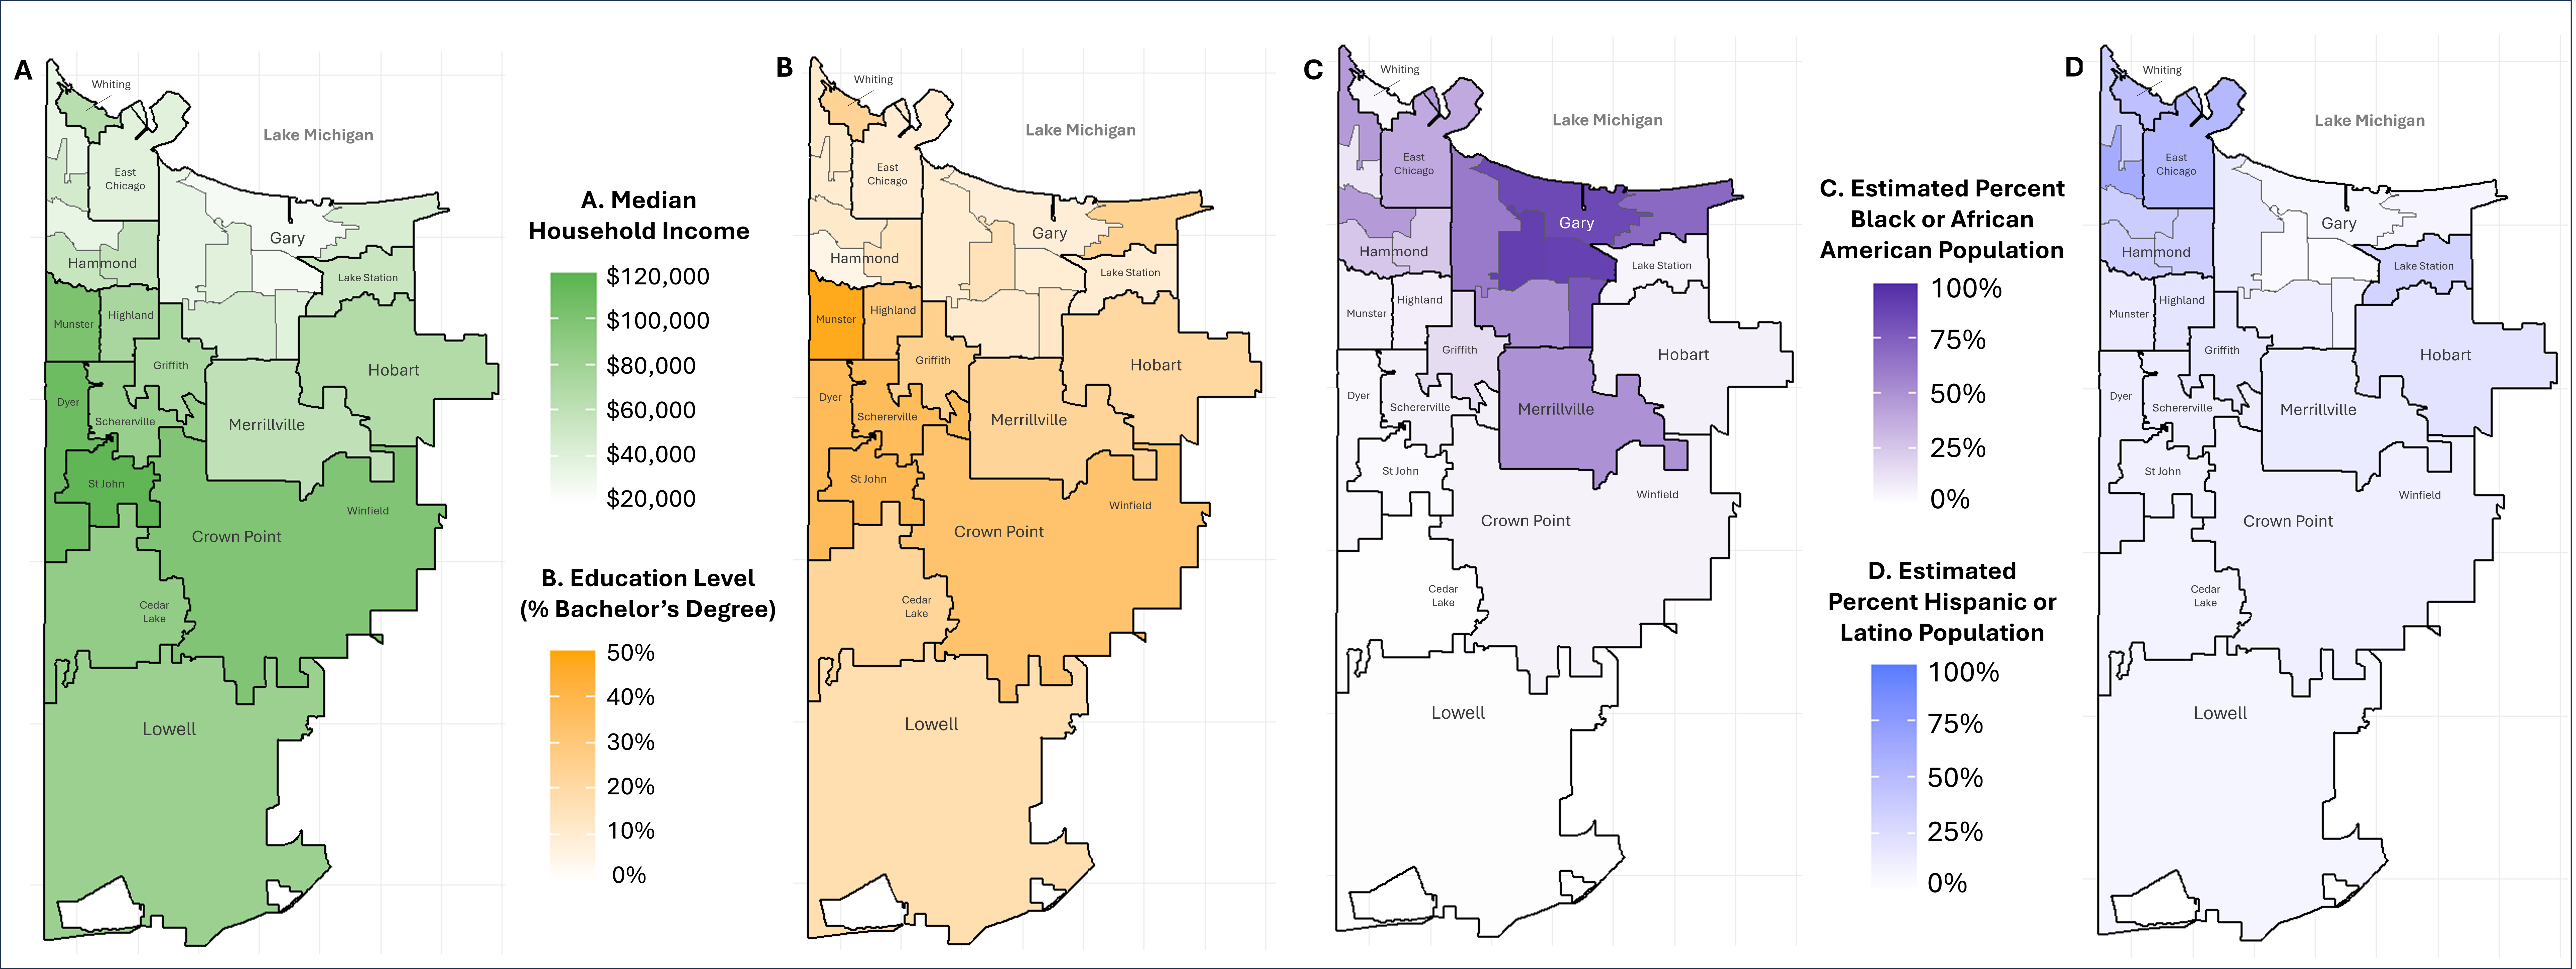 |
| --- |
| **Figure S1. Heatmaps of Select Social Determinants of Health Statistics by ZIP Codes for Lake County, IN**. Data adapted from CDC Census Bureau.14,15A) Median Household Income (dollars). B) Education Level (Percent Bachelor’s Degree or Higher). C) Estimated Percent Black or African American Population. D) Estimated Percent Hispanic or Latino Population. Maps are annotated with major municipalities. |

**
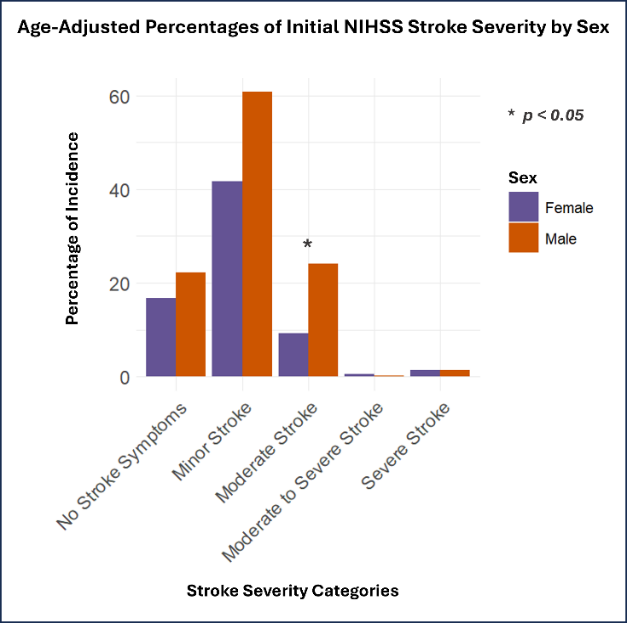
**

**Figure S2. Distribution of Initial NIHSS Stroke Severity Categories by Sex, Age-Adjusted.** Illustrates the percentage incidence of patients, grouped by Sex and adjusted for age, for each NIHSS (National Institute of Health Stroke Scale) stroke severity category. Initial NIHSS scores are taken upon patient admission.

]
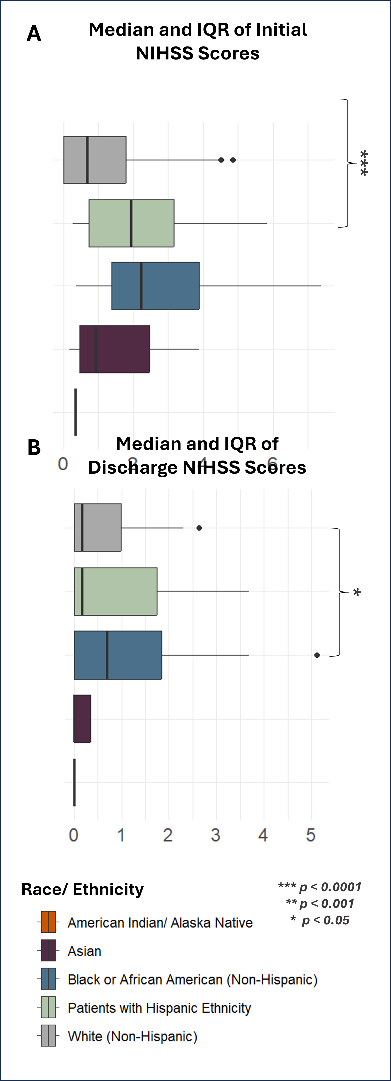


**Figure S3. Boxplots of NIHSS Stroke Statistics by Race and Ethnicity, Age-Adjusted.** Boxplots illustrate the distribution of Initial and Discharge NIHSS (National Institute of Health Stroke Scale) scores across Race and Ethnicity groups. The central line within each box represents the median value, while the box length itself represents the IQR (interquartile range). The lines beyond each box extend from the box minimum and maximum within 1.5 times the IQR, demonstrating the range of data. Any data points outside this range, indicated as dots, represents outliers.

| **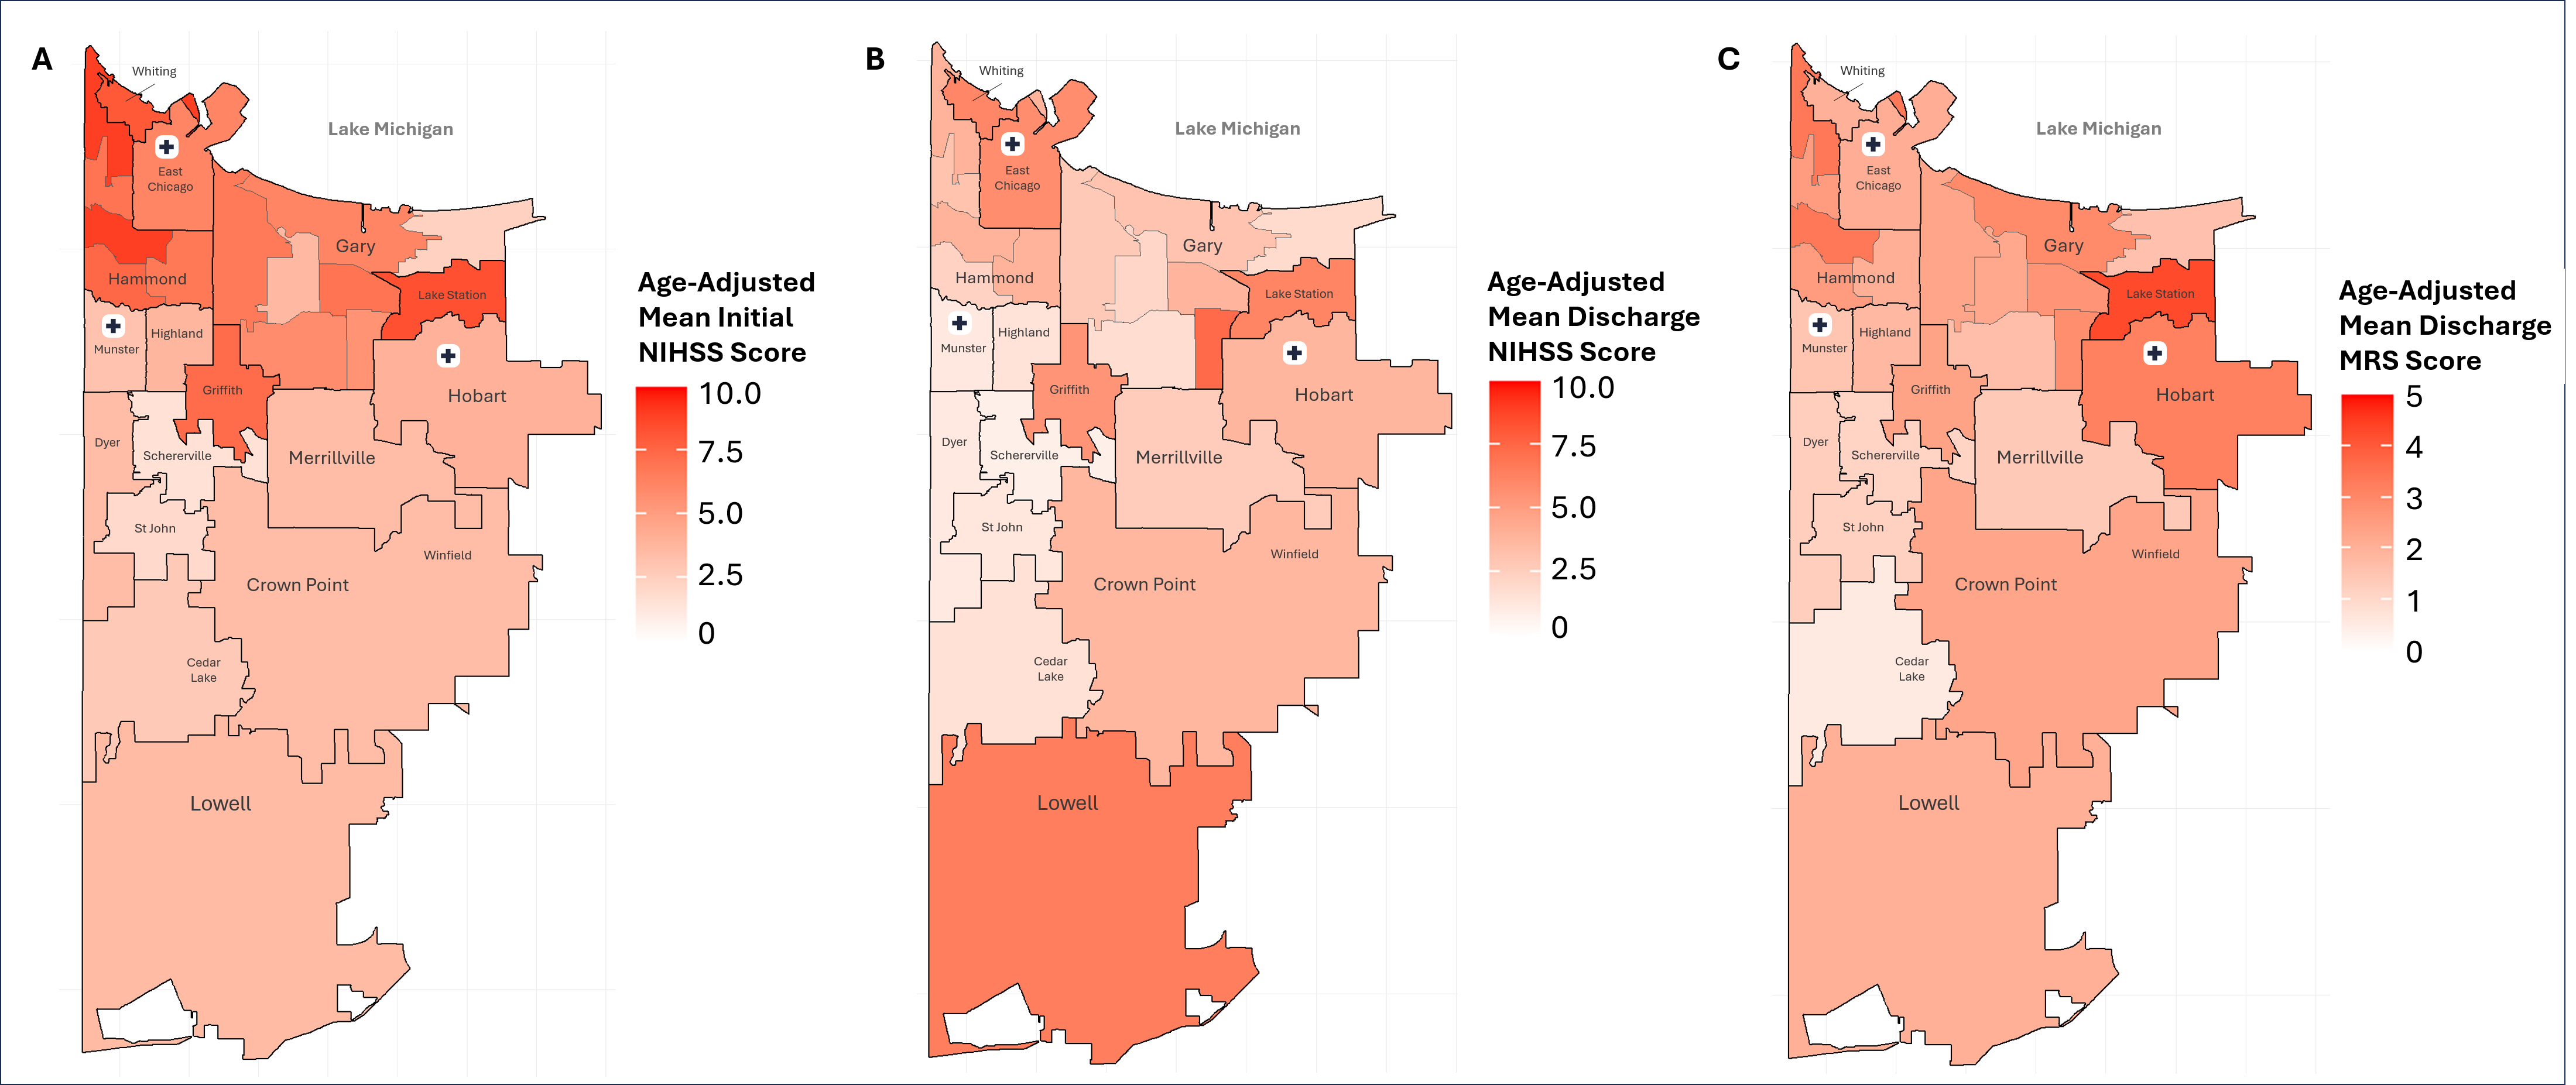** |
| --- |
| **Figure S4. Heatmaps of Mean Stroke Scale Scores by ZIP Code, Age-Adjusted.** A) Heatmap of age-adjusted mean Initial NIHSS (National Institute of Health Stroke Scale) scores; data collected upon patient admission. B) Heatmap of age-adjusted mean Discharge NIHSS scores; data collected upon patient release. C) Heatmap of age-adjusted mean Discharge mRS (modified Rankin Score) scores; data collected upon patient release. Annotated with municipalities and markers indicating location of stroke centers. |

**
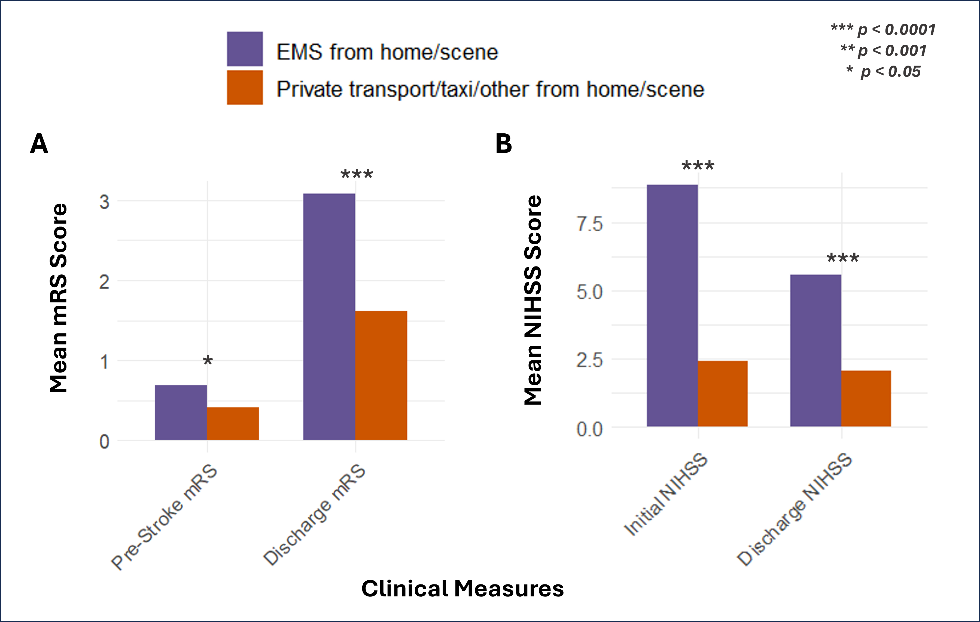
**

**Figure S5. Bar Graph of Mean mRS and NIHSS Scores by Arrival Method.** mRS (modified Rankin Score) data is collected prior to stroke (Pre-Stroke) and upon patient release (Discharge). NIHSS (National Institute of Health Stroke Scale) data is collected upon patient admission (Initial) and release (Discharge).

| ***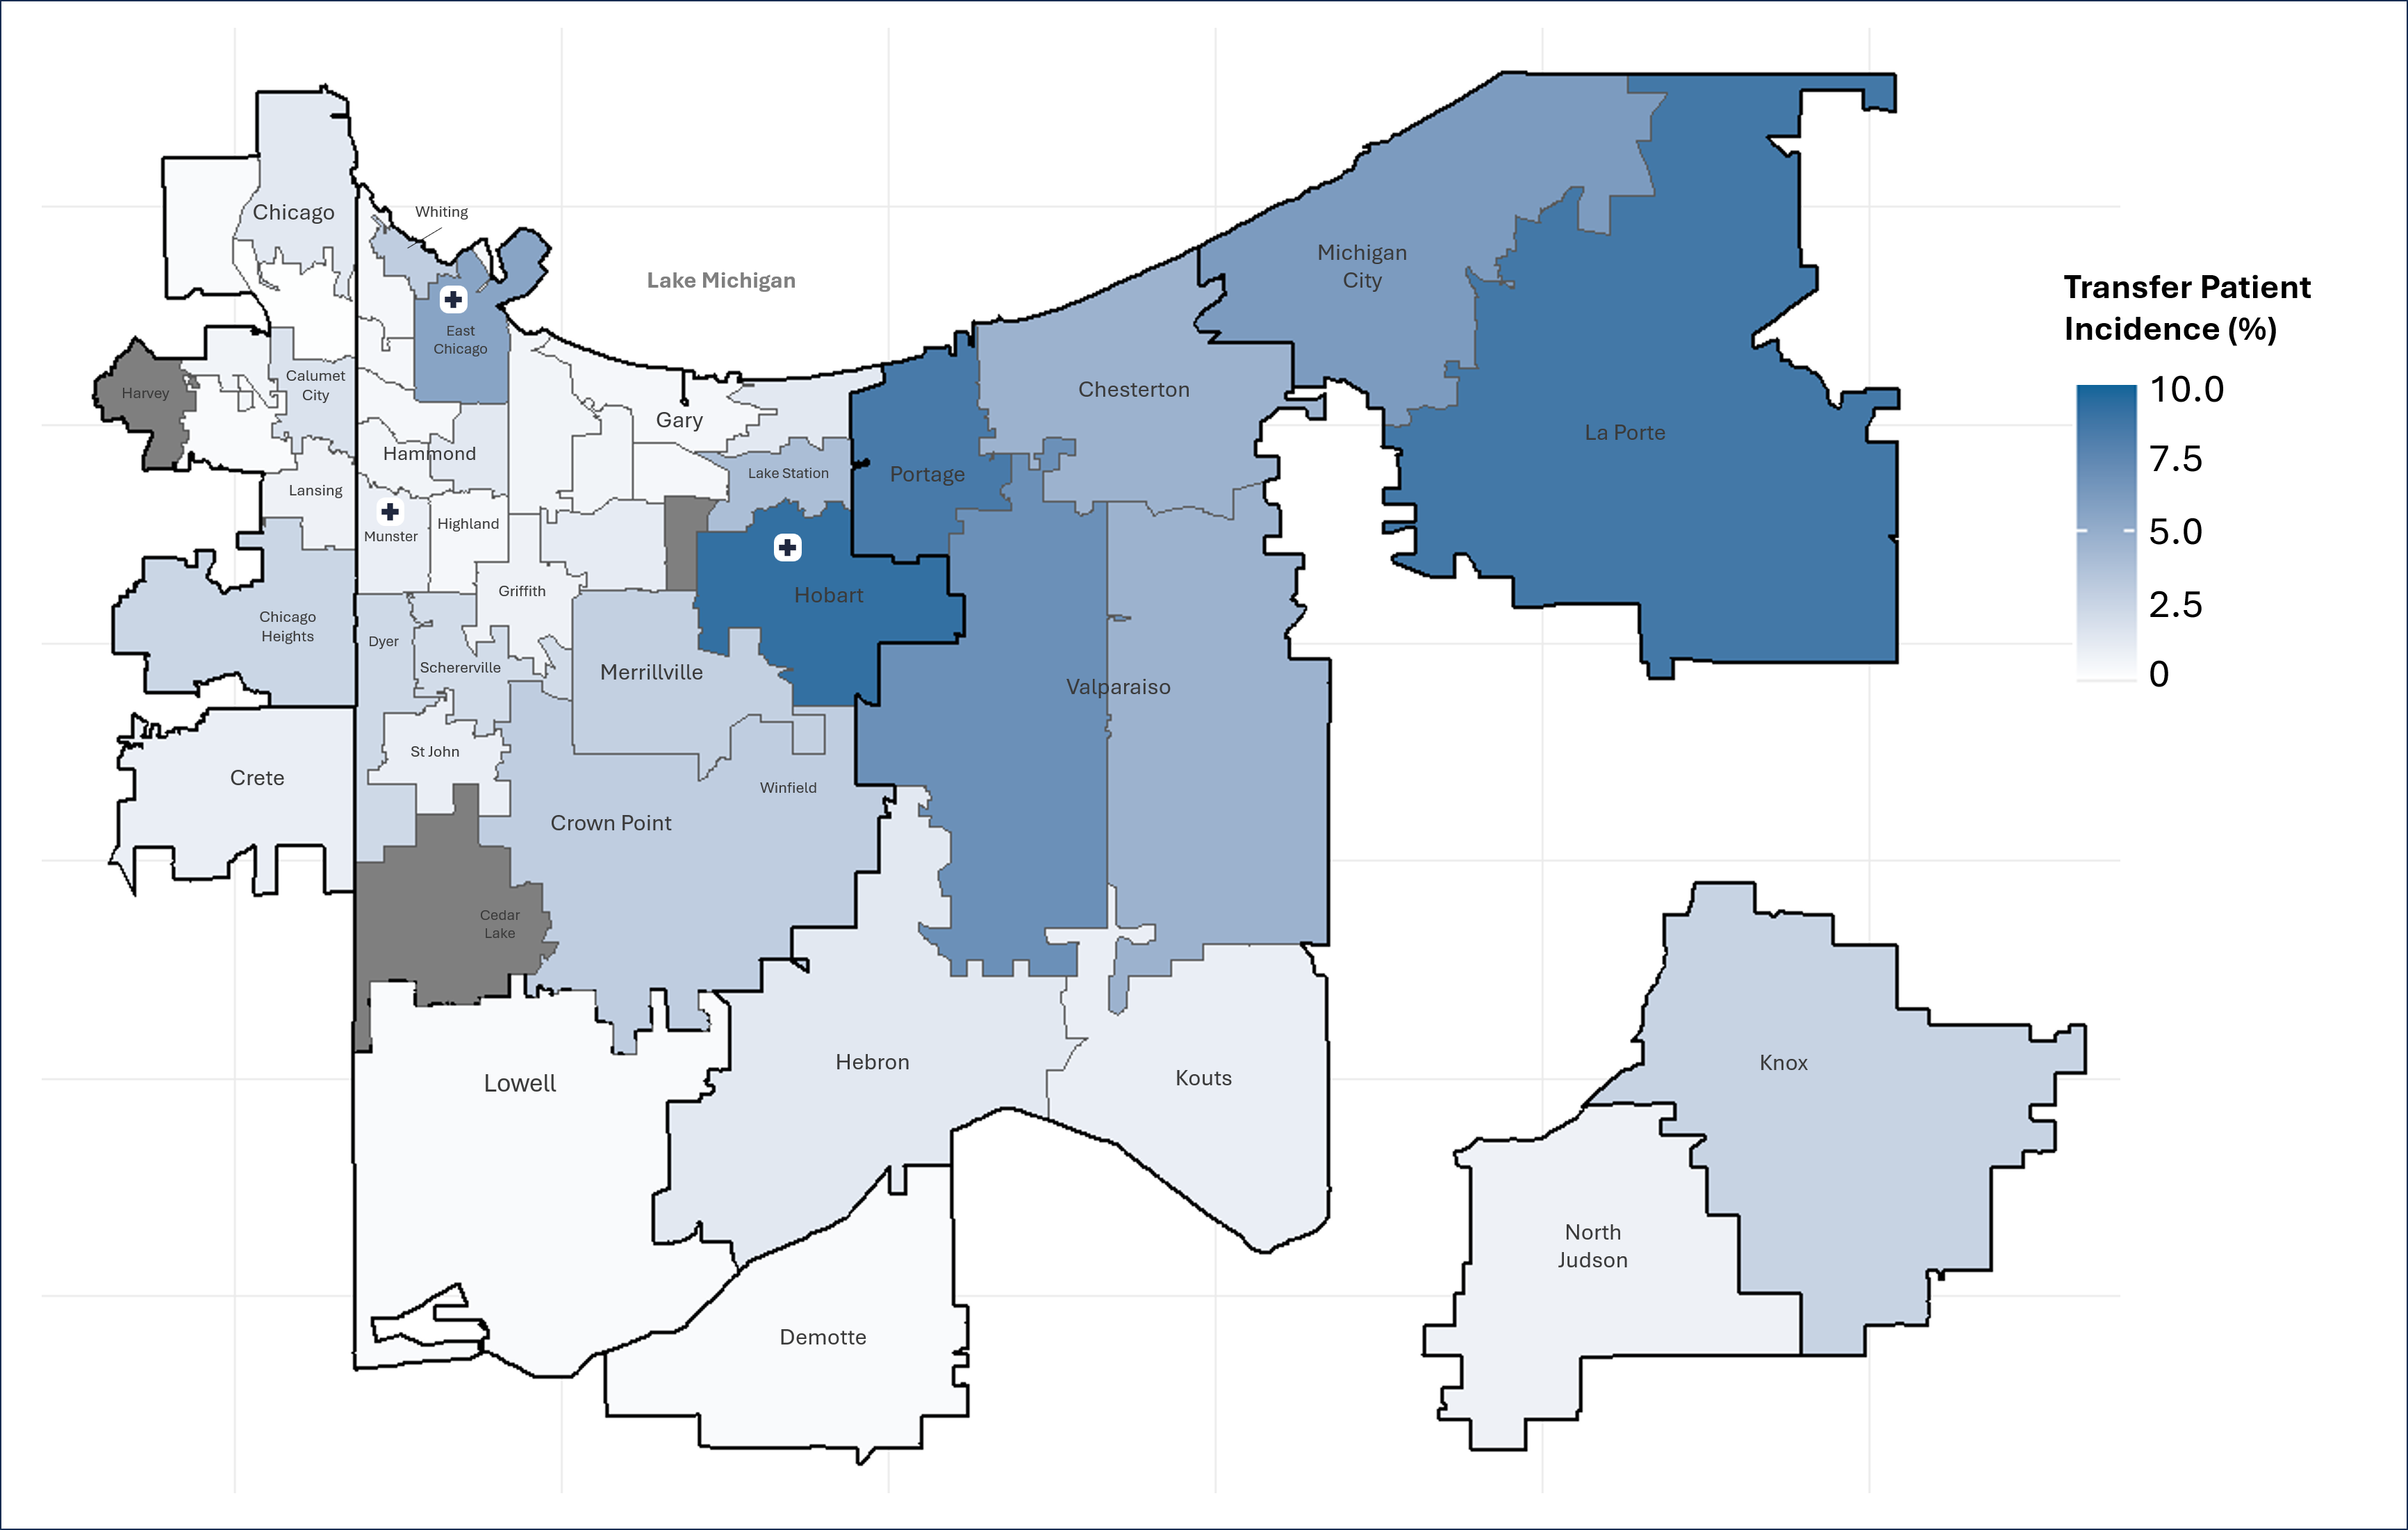*** |
| --- |
| **Figure S6. Heatmap of Transfer Patient Incidence by ZIP Code.** Annotated with municipalities and markers indicating location of stroke centers. |

| **ZIP Code (ZCTA5)** | **Municipality** | **Estimated Population** | **Median Household Income** | **Education Level**  **(% with Bachelor’s Degree or Higher)** | **Estimated White Population** | | **Estimated Black or African American Population** | | **Estimated Hispanic or Latino Population** | | **Estimated Asian Population** | | **Estimated Minority Population** |
| --- | --- | --- | --- | --- | --- | --- | --- | --- | --- | --- | --- | --- | --- |
| **Count** | **Percent** | **Count** | **Percent** | **Count** | **Percent** | **Count** | **Percent** | **Percent** |
| 46303 | Cedar Lake | 17028 | 88571.00 | 23.10% | 14540 | 85.39% | 88 | 0.52% | 1499 | 8.80% | 82 | 0.48% | 9.32% |
| 46307 | Crown Point | 69248 | 98580.00 | 33.00% | 52845 | 76.31% | 4045 | 5.84% | 8036 | 11.60% | 1539 | 2.22% | 17.45% |
| 46311 | Dyer | 22431 | 109631.00 | 37.20% | 17212 | 76.73% | 837 | 3.73% | 2964 | 13.21% | 692 | 3.09% | 16.95% |
| 46312 | East Chicago | 26370 | 39434.00 | 10.00% | 1600 | 6.07% | 10375 | 39.34% | 13864 | 52.57% | 57 | 0.22% | 91.92% |
| 46319 | Griffith | 18108 | 73275.00 | 25.30% | 11026 | 60.89% | 2806 | 15.50% | 3322 | 18.35% | 146 | 0.81% | 33.84% |
| 46320 | Hammond | 14514 | 34806.00 | 11.80% | 1996 | 13.75% | 6674 | 45.98% | 5304 | 36.54% | 36 | 0.25% | 82.53% |
| 46321 | Munster | 23894 | 101851.00 | 47.80% | 16343 | 68.40% | 1456 | 6.09% | 3722 | 15.58% | 1517 | 6.35% | 21.67% |
| 46322 | Highland | 23984 | 74991.00 | 30.30% | 16411 | 68.42% | 1793 | 7.48% | 4469 | 18.63% | 415 | 1.73% | 26.11% |
| 46323 | Hammond | 22510 | 57683.00 | 14.20% | 7787 | 34.59% | 5546 | 24.64% | 7931 | 35.23% | 320 | 1.42% | 59.87% |
| 46324 | Hammond | 22611 | 55750.00 | 5.60% | 7814 | 34.56% | 5753 | 25.44% | 8096 | 35.81% | 148 | 0.65% | 61.25% |
| 46327 | Hammond | 11078 | 48155.00 | 10.40% | 2682 | 24.21% | 1290 | 11.64% | 6817 | 61.54% | 42 | 0.38% | 73.18% |
| 46342 | Hobart | 32540 | 68808.00 | 21.60% | 21874 | 67.22% | 2212 | 6.80% | 6643 | 20.41% | 285 | 0.88% | 27.21% |
| 46356 | Lowell | 18668 | 82788.00 | 17.80% | 16266 | 87.13% | 127 | 0.68% | 1369 | 7.33% | 57 | 0.31% | 8.01% |
| 46373 | St. John | 17839 | 117632.00 | 38.50% | 14416 | 80.81% | 502 | 2.81% | 1980 | 11.10% | 303 | 1.70% | 13.91% |
| 46375 | Schererville | 24051 | 85217.00 | 37.00% | 17423 | 72.44% | 1574 | 6.54% | 3247 | 13.50% | 897 | 3.73% | 20.05% |
| 46394 | Whiting | 11725 | 65212.00 | 23.90% | 5422 | 46.24% | 465 | 3.97% | 5432 | 46.33% | 88 | 0.75% | 50.29% |
| 46402 | Gary | 5502 | 26101.00 | 8.90% | 167 | 3.04% | 4738 | 86.11% | 372 | 6.76% | 5 | 0.09% | 92.88% |
| 46403 | Gary | 11649 | 44315.00 | 24.80% | 2069 | 17.76% | 8186 | 70.27% | 804 | 6.90% | 42 | 0.36% | 77.17% |
| 46404 | Gary | 15658 | 39281.00 | 15.70% | 223 | 1.42% | 14284 | 91.22% | 679 | 4.34% | 11 | 0.07% | 95.56% |
| 46405 | Lake Station | 11860 | 54521.00 | 10.10% | 6794 | 57.28% | 604 | 5.09% | 3795 | 32.00% | 35 | 0.30% | 37.09% |
| 46406 | Gary | 8776 | 34550.00 | 10.30% | 1639 | 18.68% | 5445 | 62.04% | 1333 | 15.19% | 11 | 0.13% | 77.23% |
| 46407 | Gary | 9862 | 26502.00 | 9.70% | 220 | 2.23% | 8897 | 90.21% | 361 | 3.66% | 14 | 0.14% | 93.88% |
| 46408 | Gary | 15109 | 46690.00 | 11.20% | 4412 | 29.20% | 7838 | 51.88% | 1977 | 13.08% | 70 | 0.46% | 64.96% |
| 46409 | Gary | 6975 | 39554.00 | 12.70% | 493 | 7.07% | 5572 | 79.89% | 636 | 9.12% | 5 | 0.07% | 89.00% |
| 46410 | Merrillville | 39471 | 60432.00 | 23.40% | 11504 | 29.15% | 20036 | 50.76% | 5694 | 14.43% | 581 | 1.47% | 65.19% |

**Table S1. U.S. Census Bureau Demographical Statistics by ZIP Code Tabulation Areas (ZCTA5) for Lake County, IN.** Data adapted from CDC Census Bureau.14,15 Estimated Minority Population is a total of the Estimated Populations of Hispanic or Latino, Black or African American, and Asian groups.

| **National Institutes of Health Stroke Scale**  **(NIHSS)** | | **modified Rankin Scale**  **(mRS)** | |
| --- | --- | --- | --- |
| **0**  **1-4**  **5-15**  **16-20**  **21-42**  **Expired** | **No stroke symptoms**  **Minor stroke symptoms**  **Moderate stroke symptoms**  **Moderate to severe stroke symptoms**  **Severe stroke symptoms**  **Expired** | **0**  **1**  **2**  **3**  **4**  **5**  **6** | **No symptoms**  **No significant disability**  **Slight disability**  **Moderate disability**  **Moderately severe disability**  **Severe disability**  **Expired** |

**Table S2. Measures of Clinical Outcome.** Describes the mRS and NIHSS models and their associated clinical measurements of stroke severity.

| **Sex** | **n** | **Mean Pre-Stroke mRS** | **Median Pre-Stroke mRS** | **IQR** | **MWU Test Statistic (W)** | ***p*-value** |
| --- | --- | --- | --- | --- | --- | --- |
| Male | 319 | 0.7273 | 0 | 1.00 | 47947 | 0.000041 |
| Female | 261 | 0.3640 | 0 | 0.00 |
| **23Sex** | **n** | **Mean Discharge MRS** | **Median Discharge MRS** | **IQR** | **MWU Test Statistic (W)** | ***p*-value** |
| Male | 600 | 2.4150 | 2 | 4.00 | 161000 | 0.59 |
| Female | 527 | 2.3378 | 2 | 4.00 |
| **Sex** | **n** | **Mean Initial NIHSS** | **Median Initial NIHSS** | **IQR** | **MWU Test Statistic (W)** | ***p*-value** |
| Male | 798 | 5.9787 | 2 | 8.00 | 271549 | 0.98 |
| Female | 681 | 5.5316 | 3 | 6.00 |
| **Sex** | **n** | **Mean Discharge NIHSS** | **Median Discharge NIHSS** | **IQR** | **MWU Test Statistic (W)** | ***p*-value** |
| Male | 402 | 3.5050 | 1 | 4.00 | 67473 | 0.36 |
| Female | 349 | 3.8252 | 2 | 4.00 |

**Table A3. Descriptive and Mann Whitney U Statistics of mRS and NIHSS Scores by Sex.** NIHSS (National Institute of Health Stroke Scale) data is collected upon patient admission (Initial) and release (Discharge). mRS (modified Rankin Score) data is collected prior to stroke (Pre-Stroke) and upon patient release (Discharge). IQR (interquartile range).

| **Sex** | **Initial NIHSS Stroke Severity** | **Normal Conditions** | | | **Chi-Square Conditions** | | | **Age-Adjusted** |
| --- | --- | --- | --- | --- | --- | --- | --- | --- |
| **N** | **Percent by Group (%)** | **Percent Total (%)** | **N** | **Percent by Group (%)** | **Percent Total (%)** | **Expected Total Percentage (%)** |
| Male | No Stroke Symptoms  (NIHSS = 0) | 159 | 44.17 | 10.75 | 157 | 43.85 | 10.82 | 22.27 |
| Female | 201 | 55.83 | 13.59 | 201 | 56.15 | 13.85 | 16.73 |
| Male | Minor Stroke  (NIHSS = 1-4) | 292 | 48.34 | 19.74 | 290 | 48.17 | 19.99 | 60.84 |
| Female | 312 | 51.66 | 21.10 | 312 | 51.83 | 21.50 | 41.67 |
| Male | Moderate Stroke  (NIHSS = 5-15) | 154 | 46.25 | 10.41 | 152 | 45.92 | 10.48 | 24.13 |
| Female | 179 | 53.75 | 12.10 | 179 | 54.08 | 12.34 | 9.28 |
| Male | Moderate to Severe Stroke  (NIHSS = 16-20) | 25 | 40.32 | 1.69 | 15 | 31.25 | 1.03 | 0.19 |
| Female | 37 | 59.68 | 2.50 | 33 | 68.75 | 2.27 | 0.63 |
| Male | Severe Stroke  (NIHSS = 21-42) | 51 | 42.50 | 3.45 | 46 | 41.07 | 3.17 | 1.49 |
| Female | 69 | 57.50 | 4.67 | 66 | 58.93 | 4.55 | 1.38 |

**Table S4. Descriptive Statistics of Initial NIHSS Stroke Severity Categories by Sex.** Initial NIHSS (National Institute of Health Stroke Scale) data is collected upon patient admission. Normal conditions include patients who meet the following criteria: 1) they were not transferred from another hospital, and 2) they are residents of Lake County. The Chi-Square analysis excludes cells with fewer than two groups or age groups (per sex category) where the stroke severity counts are 5 or fewer. NULL values indicate cells where the chi-squared test conditions were not met or could not be performed.

| **Sex** | **Initial NIHSS Stroke Severity** | **Age-Adjusted** | |
| --- | --- | --- | --- |
| **X2 Statistic** | ***p*-value** |
| Male x Female | No Stroke Symptoms  (NIHSS = 0) | 0.7880 | 0.3747 |
| Minor Stroke  (NIHSS = 1-4) | 3.5842 | 0.0583 |
| Moderate Stroke  (NIHSS = 5-15) | 6.6071 | 0.0102 |
| Moderate to Severe Stroke  (NIHSS = 16-20) | 0.2346 | 0.6281 |
| Severe Stroke  (NIHSS = 21-42) | 0.004197 | 0.9483 |

**Table S5. Pairwise Comparisons of Initial NIHSS Stroke Severity by Sex, Age Adjusted.** Initial NIHSS (National Institute of Health Stroke Scale) data is collected upon patient admission.

| **Sex** | **Discharge NIHSS Stroke Severity** | **Normal Conditions** | | | **Chi-Square Conditions** | | | **Age-Adjusted** |
| --- | --- | --- | --- | --- | --- | --- | --- | --- |
| **N** | **Percent by Group (%)** | **Percent Total (%)** | **N** | **Percent by Group (%)** | **Percent Total (%)** | **Expected Total Percentage (%)** |
| Male | No Stroke Symptoms  (NIHSS = 0) | 116 | 45.14 | 13.93 | 109 | 43.78 | 14.05 | 21.13 |
| Female | 141 | 54.86 | 16.93 | 140 | 56.22 | 18.04 | 29.12 |
| Male | Minor Stroke  (NIHSS = 1-4) | 151 | 45.21 | 18.13 | 150 | 45.05 | 19.33 | 38.89 |
| Female | 183 | 54.79 | 21.97 | 183 | 54.95 | 23.58 | 25.19 |
| Male | Moderate Stroke  (NIHSS = 5-15) | 61 | 52.59 | 7.32 | 54 | 52.43 | 6.96 | 6.80 |
| Female | 55 | 47.41 | 6.60 | 49 | 47.57 | 6.31 | 1.51 |
| Male | Moderate to Severe Stroke  (NIHSS = 16-20) | 8 | 44.44 | 0.96 | 5 | 50.00 | 0.64 | 0.18 |
| Female | 10 | 55.56 | 1.20 | 5 | 50.00 | 0.64 | 0.14 |
| Male | Severe Stroke  (NIHSS = 21-42) | 13 | 50.00 | 1.56 | NULL | NULL | NULL | NULL |
| Female | 13 | 50.00 | 1.56 | 5 | 0.64 | 100.00 | 0.30 |
| Male | Expired | 34 | 41.46 | 4.08 | 29 | 3.74 | 38.16 | 0.94 |
| Female | 48 | 58.54 | 5.76 | 47 | 6.06 | 61.84 | 0.95 |

**Table S6. Descriptive Statistics of Discharge NIHSS Stroke Severity Categories by Sex.** Discharge NIHSS (National Institute of Health Stroke Scale) data is collected upon patient release. Normal conditions include patients who meet the following criteria: 1) they were not transferred from another hospital, and 2) they are residents of Lake County. The Chi-Square analysis excludes cells with fewer than two groups or age groups (per sex category) where the stroke severity counts are 5 or fewer. NULL values indicate cells where the chi-squared test conditions were not met or could not be performed.

| **Sex** | **Discharge NIHSS Stroke Severity** | **Age-Adjusted** | | |
| --- | --- | --- | --- | --- |
| **X2 Statistic** | ***p*-value** |
| Male x Female | No Stroke Symptoms  (NIHSS = 0) | 1.2722 | 0.2594 |
| Minor Stroke  (NIHSS = 1-4) | 2.9286 | 0.0870 |
| Moderate Stroke  (NIHSS = 5-15) | 3.3744 | 0.0662 |
| Moderate to Severe Stroke  (NIHSS = 16-20) | 0.0035 | 0.9526 |
| Severe Stroke  (NIHSS = 21-42) | NULL | NULL |
| Expired | 0.000146 | 0.9904 |

**Table S7. Pairwise Comparisons of Discharge NIHSS Stroke Severity by Sex, Age-Adjusted.** Discharge NIHSS (National Institute of Health Stroke Scale) data is collected upon patient release. NULL values indicate cells where the chi-squared test conditions were not met or could not be performed.

| **Race/Ethnicity** | **n** | **Mean Pre-Stroke mRS** | **Median Pre-Stroke mRS** | **IQR** | **Kruskal-Wallis X2 Statistic** | **Degrees of Freedom** | ***p*-value** |
| --- | --- | --- | --- | --- | --- | --- | --- |
| American Indian/ Alaska Native | 0 | NA | NA | NA | 2.2038 | 3 | 0.5312 |
| Asian | 7 | 0.2024 | 0 | 0.3542 |
| Black or African American | 113 | 0.2840 | 0 | 0.00 |
| Hispanic Ethnicity | 102 | 0.3516 | 0 | 0.00 |
| White | 350 | 0.3295 | 0 | 0.1851 |
| **Race/Ethnicity** | **n** | **Mean Discharge mRS** | **Median Discharge mRS** | **IQR** | **Kruskal-Wallis X2 Statistic** | **Degrees of Freedom** | ***p*-value** |
| American Indian/ Alaska Native | 3 | 0.6211 | 0 | 0.9316 | 8.5326 | 4 | 0.07391 |
| Asian | 12 | 1.0029 | 0.8962 | 1.0861 |
| Black or African American | 321 | 2.5616 | 1.4339 | 3.5368 |
| Hispanic Ethnicity | 233 | 2.1873 | 1.4339 | 3.0507 |
| White | 896 | 1.8091 | 0.7627 | 2.1509 |
| **Race/Ethnicity** | **n** | **Mean Initial NIHSS** | **Median Initial NIHSS** | **IQR** | **Kruskal-Wallis X2 Statistic** | **Degrees of Freedom** | ***p*-value** |
| American Indian/ Alaska Native | 3 | 1.5936 | 0.3473 | 2.2167 | 20.128 | 4 | 0.0004712 |
| Asian | 12 | 2.5935 | 0.9293 | 3.8299 |
| Black or African American | 239 | 7.1049 | 2.2167 | 7.0260 |
| Hispanic Ethnicity | 180 | 5.8038 | 1.9494 | 5.5761 |
| White | 680 | 4.6008 | 1.4778 | 4.8622 |
| **Race/Ethnicity** | **n** | **Mean Discharge NIHSS** | **Median Discharge NIHSS** | **IQR** | **Kruskal-Wallis X2 Statistic** | **Degrees of Freedom** | ***p*-value** |
| American Indian/ Alaska Native | 1 | 0.00 | 0 | 0.00 | 15.936 | 4 | 0.003106 |
| Asian | 5 | 0.1372 | 0 | 0.3430 |
| Black or African American | 156 | 4.6755 | 1.6731 | 5.2188 |
| Hispanic Ethnicity | 120 | 3.8557 | 0.9844 | 3.6838 |
| White | 462 | 2.7593 | 0.6981 | 2.6251 |

**Table S8. Descriptive and Kruskal Wallis Statistics for mRS and NIHSS Scores by Race and Ethnicity.** mRS (modified Rankin Score) data is collected prior to stroke (Pre-Stroke) and upon patient release (Discharge). NIHSS (National Institute of Health Stroke Scale) data is collected upon patient admission (Initial) and release (Discharge). IQR (interquartile range).

| **Pairwise Comparisons of Race/Ethnicity Groups** | **Adjusted *p*-value for Initial NIHSS** | **Adjusted *p*-value for Discharge NIHSS** |
| --- | --- | --- |
| American Indian/Alaska Native x Asian | 1.0 | 1.00 |
| American Indian/Alaska Native x Black or African American | 1.0 | 0.81588 |
| Asian x Black or African American | 1.0 | 0.10573 |
| American Indian/Alaska Native x Hispanic Ethnicity | 1.0 | 1.00 |
| Asian x Hispanic Ethnicity | 1.0 | 0.35010 |
| Black or African American x Hispanic Ethnicity | 0.633939 | 0.34739 |
| American Indian/Alaska Native x White | 1.00 | 1.00 |
| Asian x White | 1.00 | 0.50658 |
| Black or African American x White | 0.000098 | 0.00397 |
| Hispanic Ethnicity x White | 0.232940 | 1.00 |

**Table S9. Pairwise Comparisons of Initial Stroke Scale Scores by Race and Ethnicity, Age-Adjusted. Pa**irwise comparisons were conducted as a follow-up Dunn test with Bonferroni correction for significant Kruskal Wallis stroke scales. NIHSS (National Institute of Health Stroke Scale) data is collected upon patient admission (Initial) and release (Discharge).

| **Race/ Ethnicity** | **Initial NIHSS Stroke Severity** | **Normal Conditions** | | | **Chi-Square Conditions** | | | **Age-Adjusted** | |
| --- | --- | --- | --- | --- | --- | --- | --- | --- | --- |
| **N** | **Percent by Group (%)** | **Percent Total (%)** | **N** | **Percent by Group (%)** | **Percent Total (%)** | **Expected Total Percentage (%)** |
| American Indian/ Alaska Native | No Stroke Symptoms  (NIHSS = 0) | 1 | 0.07 | 33.33 | NULL | NULL | NULL | NULL |
| Asian | 3 | 0.20 | 25.00 | NULL | NULL | NULL | NULL |
| Black or African American | 67 | 4.57 | 20.87 | 62 | 4.43 | 20.95 | 7.24 |
| Hispanic Ethnicity | 51 | 3.48 | 21.89 | 49 | 3.51 | 23.11 | 9.03 |
| White | 230 | 15.70 | 25.67 | 228 | 16.31 | 25.62 | 24.89 |
| American Indian/ Alaska Native | Minor Stroke  (NIHSS = 1-4) | 1 | 0.07 | 33.33 | NULL | NULL | NULL | NULL |
| Asian | 5 | 0.34 | 41.67 | NULL | NULL | NULL | NULL |
| Black or African American | 141 | 9.62 | 43.93 | 141 | 10.09 | 47.64 | 56.86 |
| Hispanic Ethnicity | 103 | 7.00 | 44.21 | 103 | 7.37 | 48.58 | 25.05 |
| White | 350 | 23.89 | 39.06 | 348 | 24.89 | 39.10 | 41.08 |
| American Indian/ Alaska Native | Moderate Stroke  (NIHSS = 5-15) | 1 | 0.07 | 33.33 | NULL | NULL | NULL | NULL |
| Asian | 2 | 0.14 | 16.67 | NULL | NULL | NULL | NULL |
| Black or African American | 78 | 5.32 | 24.30 | 74 | 5.29 | 25.00 | 7.79 |
| Hispanic Ethnicity | 49 | 3.34 | 21.03 | 47 | 3.36 | 22.17 | 5.97 |
| White | 202 | 13.79 | 22.54 | 202 | 14.45 | 22.70 | 18.09 |
| American Indian/ Alaska Native | Moderate to Severe Stroke  (NIHSS = 16-20) | 0 | 0.00 | 0.00 | NULL | NULL | NULL | NULL |
| Asian | 0 | 0.00 | 0.00 | NULL | NULL | NULL | NULL |
| Black or African American | 11 | 0.75 | 3.43 | NULL | NULL | NULL | NULL |
| Hispanic Ethnicity | 10 | 0.68 | 4.29 | NULL | NULL | NULL | NULL |
| White | 40 | 2.73 | 4.46 | 40 | 2.86 | 4.49 | 0.44 |
| American Indian/ Alaska Native | Severe Stroke  (NIHSS = 21-42) | 0 | 0.00 | 0.00 | NULL | NULL | NULL | NULL |
| Asian | 2 | 0.14 | 16.67 | NULL | NULL | NULL | NULL |
| Black or African American | 24 | 1.64 | 7.48 | 19 | 1.36 | 6.42 | 1.03 |
| Hispanic Ethnicity | 20 | 1.37 | 8.58 | 13 | 0.93 | 6.13 | 1.07 |
| White | 74 | 5.05 | 8.26 | 72 | 5.15 | 8.09 | 1.22 |

**Table S10. Descriptive Statistics of Initial NIHSS Stroke Severity Categories by Race and Ethnicity.** Initial NIHSS (National Institute of Health Stroke Scale) data is collected upon patient admission. Normal conditions include patients who meet the following criteria: 1) they were not transferred from another hospital, and 2) they are residents of Lake County. The Chi-Square analysis excludes cells with fewer than two groups or age groups (per sex category) where the stroke severity counts are 5 or fewer. NULL values indicate cells where the chi-squared test conditions were not met or could not be performed.

| **All Groups of Race/ Ethnicity** | **Initial NIHSS Stroke Severity** | **Age-Adjusted** | |
| --- | --- | --- | --- |
| **X2 Statistic** | ***p*-value** |
| Black or African American x  Hispanic Ethnicity x  White | No Stroke Symptoms  (NIHSS = 0) | 7.4148 | 0.0065 |
| Minor Stroke  (NIHSS = 1-4) | 3.8857 | 0.0487 |
| Moderate Stroke  (NIHSS = 5-15) | 6.1044 | 0.0135 |
| Moderate to Severe Stroke  (NIHSS = 16-20) | NULL | NULL |
| Severe Stroke  (NIHSS = 21-42) | 0.0185 | 0.9908 |
| **Specific Pairwise Comparisons of Race/ Ethnicity** | **Initial NIHSS Stroke Severity** | **Age-Adjusted** | |
| **X2 Statistic** | **Adjusted *p*-value** |
| White x Black or African American | No Stroke Symptoms  (NIHSS = 0) | 9.6986 | 0.0055 |
| White x Hispanic Ethnicity | 7.4148 | 0.0194 |
| Black or African American x Hispanic Ethnicity | 0.1976 | 1.0 |
| White x Black or African American | Minor Stroke  (NIHSS = 1-4) | 2.5436 | 0.3322 |
| White x Hispanic Ethnicity | 3.8857 | 0.1461 |
| Black or African American x Hispanic Ethnicity | 12.3558 | 0.0013 |
| White x Black or African American | Moderate Stroke  (NIHSS = 5-15) | 4.1038 | 0.1284 |
| White x Hispanic Ethnicity | 6.1044 | 0.0405 |
| Black or African American x Hispanic Ethnicity | 0.2393 | 1.0 |
| White x Black or African American | Moderate to Severe Stroke  (NIHSS = 16-20) | NULL | NULL |
| White x Hispanic Ethnicity | NULL | NULL |
| Black or African American x Hispanic Ethnicity | NULL | NULL |
| White x Black or African American | Severe Stroke  (NIHSS = 21-42) | 0.0165 | 1.0 |
| White x Hispanic Ethnicity | 0.0098 | 1.0 |
| Black or African American x Hispanic Ethnicity | 0.0009 | 1.0 |

**Table S11. Pairwise Comparisons Initial NIHSS Stroke Severity Categories by Race and Ethnicity, Age Adjusted.** Initial NIHSS (National Institute of Health Stroke Scale) data is collected upon patient admission. NULL values indicate cells where the chi-squared test conditions were not met or could not be performed.

| **Race/ Ethnicity** | **Discharge NIHSS Stroke Severity** | **Normal Conditions** | | | **Chi-Square Conditions** | | | **Age-Adjusted** |
| --- | --- | --- | --- | --- | --- | --- | --- | --- |
| **N** | **Percent by Group (%)** | **Percent Total (%)** | **N** | **Percent by Group (%)** | **Percent Total (%)** | **Expected Total Percentage (%)** |
| American Indian/ Alaska Native | No Stroke Symptoms  (NIHSS = 0) | 1 | 0.39 | 0.12 | NULL | NULL | NULL | NULL |
| Asian | 3 | 1.18 | 0.36 | NULL | NULL | NULL | NULL |
| Black or African American | 41 | 16.08 | 4.96 | 40 | 16.53 | 5.52 | 13.18 |
| Hispanic Ethnicity | 45 | 17.65 | 5.45 | 37 | 15.29 | 5.11 | 12.86 |
| White | 165 | 64.71 | 19.98 | 165 | 68.18 | 22.79 | 27.03 |
| American Indian/ Alaska Native | Minor Stroke  (NIHSS = 1-4) | 0 | 0.00 | 0.00 | NULL | NULL | NULL | NULL |
| Asian | 2 | 0.61 | 0.24 | NULL | NULL | NULL | NULL |
| Black or African American | 83 | 25.23 | 10.05 | 79 | 24.84 | 10.91 | 39.75 |
| Hispanic Ethnicity | 48 | 14.59 | 5.81 | 44 | 13.84 | 6.08 | 17.49 |
| White | 196 | 59.57 | 23.73 | 195 | 61.32 | 26.93 | 25.98 |
| American Indian/ Alaska Native | Moderate Stroke  (NIHSS = 5-15) | 0 | 0.00 | 0.00 | NULL | NULL | NULL | NULL |
| Asian | 0 | 0.00 | 0.00 | NULL | NULL | NULL | NULL |
| Black or African American | 20 | 17.24 | 2.42 | 6 | 6.90 | 0.83 | 0.67 |
| Hispanic Ethnicity | 19 | 16.38 | 2.30 | 6 | 6.90 | 0.83 | 5.06 |
| White | 77 | 66.38 | 9.32 | 75 | 86.21 | 10.36 | 4.54 |
| American Indian/ Alaska Native | Moderate to Severe Stroke  (NIHSS = 16-20) | 0 | 0.00 | 0.00 | NULL | NULL | NULL | NULL |
| Asian | 0 | 0.00 | 0.00 | NULL | NULL | NULL | NULL |
| Black or African American | 5 | 27.78 | 0.61 | NULL | NULL | NULL | NULL |
| Hispanic Ethnicity | 1 | 5.56 | 0.12 | NULL | NULL | NULL | NULL |
| White | 12 | 66.67 | 1.45 | 6 | 0.83 | 100.00 | 0.18 |
| American Indian/ Alaska Native | Severe Stroke  (NIHSS = 21-42) | 0 | 0.00 | 0.00 | NULL | NULL | NULL | NULL |
| Asian | 0 | 0.00 | 0.00 | NULL | NULL | NULL | NULL |
| Black or African American | 7 | 26.92 | 0.85 | NULL | NULL | NULL | NULL |
| Hispanic Ethnicity | 7 | 26.92 | 0.85 | NULL | NULL | NULL | NULL |
| White | 12 | 46.15 | 1.45 | 6 | 0.83 | 100.00 | 0.18 |
| American Indian/ Alaska Native | Expired | 0 | 0.00 | 0.00 | NULL | NULL | NULL | NULL |
| Asian | 0 | 0.00 | 0.00 | NULL | NULL | NULL | NULL |
| Black or African American | 13 | 15.85 | 1.57 | 5 | 7.69 | 0.69 | 0.99 |
| Hispanic Ethnicity | 14 | 17.07 | 1.69 | 10 | 15.38 | 1.38 | 0.39 |
| White | 55 | 67.07 | 6.66 | 50 | 76.92 | 6.91 | 1.06 |

**Table S12. Descriptive Statistics of Discharge NIHSS Stroke Severity Categories by Race and Ethnicity.** Discharge NIHSS (National Institute of Health Stroke Scale) data is collected upon patient release. Normal conditions include patients who meet the following criteria: 1) they were not transferred from another hospital, and 2) they are residents of Lake County. The Chi-Square analysis excludes cells with fewer than two groups or age groups (per sex category) where the stroke severity counts are 5 or fewer. NULL values indicate cells where the chi-squared test conditions were not met or could not be performed.

| **All Groups of Race/ Ethnicity** | **Initial NIHSS Stroke Severity** | **Age-Adjusted** | |
| --- | --- | --- | --- |
| **X2 Statistic** | ***p*-value** |
| Black or African American x  Hispanic Ethnicity x  White | No Stroke Symptoms  (NIHSS = 0) | 7.3961 | 0.0248 |
| Minor Stroke  (NIHSS = 1-4) | 9.0968 | 0.0106 |
| Moderate Stroke  (NIHSS = 5-15) | 3.3582 | 0.1865 |
| Moderate to Severe Stroke  (NIHSS = 16-20) | NULL | NULL |
| Severe Stroke  (NIHSS = 21-42) | NULL | NULL |
| Expired | 0.3297 | 0.8480 |
| **Specific Pairwise Comparisons of Race/ Ethnicity** | **Initial NIHSS Stroke Severity** | **Age-Adjusted** | |
| **X2 Statistic** | **Adjusted *p*-value** |
| White x Black or African American | No Stroke Symptoms  (NIHSS = 0) | 4.7671 | 0.0870 |
| White x Hispanic Ethnicity | 5.0323 | 0.0746 |
| Black or African American x Hispanic Ethnicity | 0.0040 | 1.0 |
| White x Black or African American | Minor Stroke  (NIHSS = 1-4) | 2.8841 | 0.2684 |
| White x Hispanic Ethnicity | 1.6578 | 0.5937 |
| Black or African American x Hispanic Ethnicity | 8.6548 | 0.0098 |
| White x Black or African American | Moderate Stroke  (NIHSS = 5-15) | 2.8723 | 0.2704 |
| White x Hispanic Ethnicity | 0.0280 | 1.0 |
| Black or African American x Hispanic Ethnicity | 3.3593 | 0.2005 |
| White x Black or African American | Moderate to Severe Stroke  (NIHSS = 16-20) | NULL | NULL |
| White x Hispanic Ethnicity | NULL | NULL |
| Black or African American x Hispanic Ethnicity | NULL | NULL |
| White x Black or African American | Severe Stroke  (NIHSS = 21-42) | NULL | NULL |
| White x Hispanic Ethnicity | NULL | NULL |
| Black or African American x Hispanic Ethnicity | NULL | NULL |
| White x Black or African American | Expired | 0.0022 | 1.0 |
| White x Hispanic Ethnicity | 0.3051 | 1.0 |
| Black or African American x Hispanic Ethnicity | 0.2585 | 1.0 |

**Table S13. Pairwise Comparisons Discharge NIHSS Stroke Severity Categories by Race and Ethnicity, Age Adjusted.** Discharge NIHSS (National Institute of Health Stroke Scale) data is collected upon patient release. NULL values indicate cells where the chi-squared test conditions were not met or could not be performed.

| **ZIP Code** | **Municipality** | **Pre-Stroke mRS** | | | | **Discharge mRS** | | | | **Initial NIHSS** | | | | | **Discharge NIHSS** | | | | |
| --- | --- | --- | --- | --- | --- | --- | --- | --- | --- | --- | --- | --- | --- | --- | --- | --- | --- | --- | --- |
| **n** | **Mean** | **Median** | **IQR** | **n** | **Mean** | **Median** | **IQR** | **n** | **Mean** | **Median** | **IQR** | **n** | | **Mean** | **Median** | **IQR** |
| **46303** | Cedar Lake | 7 | 0.214 | 0.0 | 0.00 | 17 | 0.563 | 0.0 | 0.76 | 17 | 2.803 | 1.9 | 3.07 | 12 | | 1.585 | 0.7 | 2.04 |
| **46307** | Crown Point | 10 | 0.575 | 0.0 | 0.00 | 20 | 2.315 | 1.5 | 2.53 | 53 | 3.438 | 0.7 | 2.94 | 29 | | 3.766 | 0.3 | 1.70 |
| **46311** | Dyer | 30 | 0.226 | 0.0 | 0.34 | 56 | 1.279 | 0.8 | 1.54 | 58 | 3.483 | 1.6 | 3.65 | 22 | | 1.169 | 0.2 | 1.56 |
| **46312** | East Chicago | 62 | 0.333 | 0.0 | 0.00 | 134 | 2.095 | 1.4 | 3.03 | 163 | 6.188 | 2.2 | 7.16 | 83 | | 5.797 | 1.8 | 7.04 |
| **46319** | Griffith | 37 | 0.182 | 0.0 | 0.00 | 70 | 2.379 | 1.4 | 3.03 | 77 | 7.297 | 2.8 | 7.42 | 35 | | 5.456 | 1.4 | 7.01 |
| **46320** | Hammond | 33 | 0.165 | 0.0 | 0.00 | 69 | 3.398 | 2.0 | 5.20 | 73 | 8.956 | 1.5 | 8.65 | 32 | | 3.930 | 1.0 | 2.00 |
| **46321** | Munster | 76 | 0.318 | 0.0 | 0.28 | 137 | 1.515 | 0.7 | 1.81 | 139 | 3.165 | 0.7 | 2.31 | 67 | | 1.226 | 0.2 | 1.64 |
| **46322** | Highland | 54 | 0.277 | 0.0 | 0.07 | 112 | 1.825 | 0.9 | 1.68 | 115 | 3.806 | 1.1 | 4.19 | 52 | | 1.450 | 0.4 | 1.87 |
| **46323** | Hammond | 55 | 0.329 | 0.0 | 0.00 | 100 | 2.064 | 1.1 | 2.27 | 108 | 6.767 | 2.0 | 6.62 | 52 | | 3.960 | 1.4 | 3.51 |
| **46324** | Hammond | 52 | 0.325 | 0.0 | 0.00 | 100 | 2.563 | 1.4 | 3.03 | 110 | 7.469 | 1.8 | 6.27 | 56 | | 2.342 | 0.8 | 2.79 |
| **46327** | Hammond | 24 | 0.555 | 0.0 | 0.00 | 31 | 2.556 | 1.5 | 3.52 | 40 | 6.986 | 2.9 | 9.87 | 17 | | 3.152 | 1.0 | 4.18 |
| **46342** | Hobart | 2 | 0.000 | 0.0 | 0.00 | 8 | 3.194 | 2.2 | 1.15 | 123 | 4.036 | 1.8 | 4.11 | 74 | | 3.770 | 1.3 | 5.52 |
| **46356** | Lowell | 5 | 0.196 | 0.0 | 0.28 | 10 | 2.055 | 1.1 | 3.18 | 11 | 3.554 | 1.5 | 4.20 | 6 | | 6.508 | 1.0 | 1.21 |
| **46373** | St. John | 11 | 0.245 | 0.0 | 0.18 | 28 | 1.211 | 0.8 | 1.28 | 27 | 1.974 | 0.6 | 1.43 | 19 | | 1.257 | 0.7 | 0.96 |
| **46375** | Schererville | 36 | 0.138 | 0.0 | 0.02 | 72 | 1.132 | 0.4 | 1.45 | 70 | 1.568 | 0.5 | 1.73 | 43 | | 0.833 | 0.0 | 0.84 |
| **46394** | Whiting | 21 | 0.565 | 0.0 | 0.09 | 52 | 2.037 | 1.1 | 2.02 | 66 | 8.094 | 1.9 | 5.53 | 34 | | 6.157 | 1.4 | 5.36 |
| **46402** | Gary | 1 | 1.495 | 1.49 | 0.00 | 5 | 2.968 | 1.1 | 1.52 | 8 | 6.216 | 3.7 | 4.02 | 6 | | 3.108 | 2.4 | 1.70 |
| **46403** | Gary | 2 | 1.826 | 1.83 | 1.83 | 3 | 1.611 | 0.8 | 1.67 | 15 | 2.431 | 1.5 | 3.24 | 9 | | 1.903 | 1.4 | 1.92 |
| **46404** | Gary | 14 | 0.477 | 0.0 | 0.35 | 22 | 2.261 | 1.1 | 2.89 | 29 | 3.622 | 1.5 | 3.61 | 11 | | 2.142 | 1.0 | 1.32 |
| **46405** | Lake Station | 2 | 1.121 | 1.12 | 1.12 | 4 | 4.308 | 4.5 | 0.97 | 37 | 8.405 | 3.9 | 11.86 | 22 | | 6.181 | 2.3 | 6.56 |
| **46406** | Gary | 14 | 0.273 | 0.0 | 0.00 | 22 | 2.328 | 1.5 | 2.18 | 26 | 6.681 | 3.9 | 6.82 | 13 | | 2.814 | 1.8 | 2.95 |
| **46407** | Gary | 4 | 0.000 | 0.0 | 0.00 | 7 | 2.741 | 0.7 | 2.23 | 14 | 6.925 | 1.0 | 5.17 | 9 | | 3.846 | 3.7 | 5.19 |
| **46408** | Gary | 14 | 0.792 | 0.0 | 0.53 | 21 | 1.681 | 0.5 | 1.43 | 29 | 5.871 | 1.9 | 5.53 | 12 | | 1.759 | 0.5 | 1.96 |
| **46409** | Gary | 0 | NA | NA | NA | 2 | 2.895 | 2.9 | 0.90 | 6 | 5.545 | 0.2 | 11.68 | 1 | | 7.353 | 7.4 | 0.00 |
| **46410** | Merrillville | 14 | 0.227 | 0.0 | 0.14 | 25 | 1.397 | 0.6 | 1.72 | 65 | 3.483 | 0.7 | 3.80 | 35 | | 2.649 | 0.3 | 2.51 |
| **Kruskal Wallis Test** | | **Pre-Stroke mRS** | | | | **Discharge mRS** | | | | **Initial NIHSS** | | | | | **Discharge NIHSS** | | | | |
| **KW X2 Statistic** | | 18.178 | | | | 42.2050 | | | | 89.2645 | | | | | 49.3690 | | | | |
| **Degrees of Freedom** | | 23 | | | | 24 | | | | 24 | | | | | 24 | | | | |
| ***p*-value** | | 0.7478 | | | | 0.012240 | | | | 1.91E-09 | | | | | 0.001702 | | | | |

**Table S14. Descriptive Statistics and Kruskal Wallis Results for mRS and NIHSS by ZIP Code, Age-Adjusted.** mRS (modified Rankin Score) data is determined prior to stroke (Pre-Stroke) and upon patient release (Discharge). NIHSS (National Institute of Health Stroke Scale) data is collected upon patient admission (Initial) and release (Discharge). IQR (interquartile range). Includes patients who meet the following criteria: 1) they were not transferred from another hospital, and 2) they are residents of Lake County.

| **Pairwise Comparisons of ZIP Codes** | **Adjusted *p*-value for Discharge mRS** | **Adjusted *p*-value for Initial NIHSS** | **Adjusted *p*-value for Discharge NIHSS** |
| --- | --- | --- | --- |
| 46303 - 46307 | 1.0 | 1.0 | 1.0 |
| 46303 - 46311 | 1.0 | 1.0 | 1.0 |
| 46307 - 46311 | 1.0 | 1.0 | 1.0 |
| 46303 - 46312 | 0.49622703 | 1.0 | 1.0 |
| 46307 - 46312 | 1.0 | 0.124445 | 1.0 |
| 46311 - 46312 | 1.0 | 1.0 | 0.613947986 |
| 46303 - 46319 | 0.74158893 | 1.0 | 1.0 |
| 46307 - 46319 | 1.0 | 0.182835 | 1.0 |
| 46311 - 46319 | 1.0 | 1.0 | 1.0 |
| 46312 - 46319 | 1.0 | 1.0 | 1.0 |
| 46303 - 46320 | 0.04643896 | 1.0 | 1.0 |
| 46307 - 46320 | 1.0 | 1.0 | 1.0 |
| 46311 - 46320 | 1.0 | 1.0 | 1.0 |
| 46312 - 46320 | 1.0 | 1.0 | 1.0 |
| 46319 - 46320 | 1.0 | 1.0 | 1.0 |
| 46303 - 46321 | 1.0 | 1.0 | 1.0 |
| 46307 - 46321 | 1.0 | 1.0 | 1.0 |
| 46311 - 46321 | 1.0 | 1.0 | 1.0 |
| 46312 - 46321 | 1.0 | 0.002202 | 0.013852896 |
| 46319 - 46321 | 1.0 | 0.016684 | 1.0 |
| 46320 - 46321 | 0.62205031 | 0.694156 | 1.0 |
| 46303 - 46322 | 1.0 | 1.0 | 1.0 |
| 46307 - 46322 | 1.0 | 1.0 | 1.0 |
| 46311 - 46322 | 1.0 | 1.0 | 1.0 |
| 46312 - 46322 | 1.0 | 0.686045 | 0.561289058 |
| 46319 - 46322 | 1.0 | 1.0 | 1.0 |
| 46320 - 46322 | 1.0 | 1.0 | 1.0 |
| 46321 - 46322 | 1.0 | 1.0 | 1.0 |
| 46303 - 46323 | 1.0 | 1.0 | 1.0 |
| 46307 - 46323 | 1.0 | 0.045908 | 1.0 |
| 46311 - 46323 | 1.0 | 1.0 | 1.0 |
| 46312 - 46323 | 1.0 | 1.0 | 1.0 |
| 46319 - 46323 | 1.0 | 1.0 | 1.0 |
| 46320 - 46323 | 1.0 | 1.0 | 1.0 |
| 46321 - 46323 | 1.0 | 0.001020 | 1.0 |
| 46322 - 46323 | 1.0 | 0.244049 | 1.0 |
| 46303 - 46324 | 0.40426832 | 1.0 | 1.0 |
| 46307 - 46324 | 1.0 | 1.0 | 1.0 |
| 46311 - 46324 | 1.0 | 1.0 | 1.0 |
| 46312 - 46324 | 1.0 | 1.0 | 1.0 |
| 46319 - 46324 | 1.0 | 1.0 | 1.0 |
| 46320 - 46324 | 1.0 | 1.0 | 1.0 |
| 46321 - 46324 | 1.0 | 0.319741 | 1.0 |
| 46322 - 46324 | 1.0 | 1.0 | 1.0 |
| 46323 - 46324 | 1.0 | 1.0 | 1.0 |
| 46303 - 46327 | 1.0 | 1.0 | 1.0 |
| 46307 - 46327 | 1.0 | 1.0 | 1.0 |
| 46311 - 46327 | 1.0 | 1.0 | 1.0 |
| 46312 - 46327 | 1.0 | 1.0 | 1.0 |
| 46319 - 46327 | 1.0 | 1.0 | 1.0 |
| 46320 - 46327 | 1.0 | 1.0 | 1.0 |
| 46321 - 46327 | 1.0 | 1.0 | 1.0 |
| 46322 - 46327 | 1.0 | 1.0 | 1.0 |
| 46323 - 46327 | 1.0 | 1.0 | 1.0 |
| 46324 - 46327 | 1.0 | 1.0 | 1.0 |
| 46303 - 46342 | 0.382127 | 1.0 | 1.0 |
| 46307 - 46342 | 1.0 | 1.0 | 1.0 |
| 46311 - 46342 | 1.0 | 1.0 | 1.0 |
| 46312 - 46342 | 1.0 | 1.0 | 1.0 |
| 46319 - 46342 | 1.0 | 1.0 | 1.0 |
| 46320 - 46342 | 1.0 | 1.0 | 1.0 |
| 46321 - 46342 | 1.0 | 1.0 | 0.441139401 |
| 46322 - 46342 | 1.0 | 1.0 | 1.0 |
| 46323 - 46342 | 1.0 | 1.0 | 1.0 |
| 46324 - 46342 | 1.0 | 1.0 | 1.0 |
| 46327 - 46342 | 1.0 | 1.0 | 1.0 |
| 46303 - 46356 | 1.0 | 1.0 | 1.0 |
| 46307 - 46356 | 1.0 | 1.0 | 1.0 |
| 46311 - 46356 | 1.0 | 1.0 | 1.0 |
| 46312 - 46356 | 1.0 | 1.0 | 1.0 |
| 46319 - 46356 | 1.0 | 1.0 | 1.0 |
| 46320 - 46356 | 1.0 | 1.0 | 1.0 |
| 46321 - 46356 | 1.0 | 1.0 | 1.0 |
| 46322 - 46356 | 1.0 | 1.0 | 1.0 |
| 46323 - 46356 | 1.0 | 1.0 | 1.0 |
| 46324 - 46356 | 1.0 | 1.0 | 1.0 |
| 46327 - 46356 | 1.0 | 1.0 | 1.0 |
| 46342 - 46356 | 1.0 | 1.0 | 1.0 |
| 46303 - 46373 | 1.0 | 1.0 | 1.0 |
| 46307 - 46373 | 1.0 | 1.0 | 1.0 |
| 46311 - 46373 | 1.0 | 1.0 | 1.0 |
| 46312 - 46373 | 1.0 | 0.195226 | 1.0 |
| 46319 - 46373 | 1.0 | 0.202504 | 1.0 |
| 46320 - 46373 | 1.0 | 1.0 | 1.0 |
| 46321 - 46373 | 1.0 | 1.0 | 1.0 |
| 46322 - 46373 | 1.0 | 1.0 | 1.0 |
| 46323 - 46373 | 1.0 | 0.080235 | 1.0 |
| 46324 - 46373 | 1.0 | 1.0 | 1.0 |
| 46327 - 46373 | 1.0 | 1.0 | 1.0 |
| 46342 - 46373 | 1.0 | 1.0 | 1.0 |
| 46356 - 46373 | 1.0 | 1.0 | 1.0 |
| 46303 - 46375 | 1.0 | 1.0 | 1.0 |
| 46307 - 46375 | 1.0 | 1.0 | 1.0 |
| 46311 - 46375 | 1.0 | 1.0 | 1.0 |
| 46312 - 46375 | 1.0 | 0.000094 | 0.001615226 |
| 46319 - 46375 | 1.0 | 0.000614 | 0.863028105 |
| 46320 - 46375 | 0.04511444 | 0.030780 | 1.0 |
| 46321 - 46375 | 1.0 | 1.0 | 1.0 |
| 46322 - 46375 | 1.0 | 1.0 | 1.0 |
| 46323 - 46375 | 1.0 | 0.000041 | 0.349452886 |
| 46324 - 46375 | 0.99834457 | 0.011811 | 1.0 |
| 46327 - 46375 | 1.0 | 0.076468 | 1.0 |
| 46342 - 46375 | 1.0 | 0.044240 | 0.051709475 |
| 46356 - 46375 | 1.0 | 1.0 | 1.0 |
| 46373 - 46375 | 1.0 | 1.0 | 1.0 |
| 46303 - 46394 | 1.0 | 1.0 | 1.0 |
| 46307 - 46394 | 1.0 | 1.0 | 1.0 |
| 46311 - 46394 | 1.0 | 1.0 | 1.0 |
| 46312 - 46394 | 1.0 | 1.0 | 1.0 |
| 46319 - 46394 | 1.0 | 1.0 | 1.0 |
| 46320 - 46394 | 1.0 | 1.0 | 1.0 |
| 46321 - 46394 | 1.0 | 0.881243 | 1.0 |
| 46322 - 46394 | 1.0 | 1.0 | 1.0 |
| 46323 - 46394 | 1.0 | 1.0 | 1.0 |
| 46324 - 46394 | 1.0 | 1.0 | 1.0 |
| 46327 - 46394 | 1.0 | 1.0 | 1.0 |
| 46342 - 46394 | 1.0 | 1.0 | 1.0 |
| 46356 - 46394 | 1.0 | 1.0 | 1.0 |
| 46373 - 46394 | 1.0 | 1.0 | 1.0 |
| 46375 - 46394 | 1.0 | 0.041849 | 0.919005992 |
| 46303 - 46402 | 1.0 | 1.0 | 1.0 |
| 46307 - 46402 | 1.0 | 1.0 | 1.0 |
| 46311 - 46402 | 1.0 | 1.0 | 1.0 |
| 46312 - 46402 | 1.0 | 1.0 | 1.0 |
| 46319 - 46402 | 1.0 | 1.0 | 1.0 |
| 46320 - 46402 | 1.0 | 1.0 | 1.0 |
| 46321 - 46402 | 1.0 | 1.0 | 1.0 |
| 46322 - 46402 | 1.0 | 1.0 | 1.0 |
| 46323 - 46402 | 1.0 | 1.0 | 1.0 |
| 46324 - 46402 | 1.0 | 1.0 | 1.0 |
| 46327 - 46402 | 1.0 | 1.0 | 1.0 |
| 46342 - 46402 | 1.0 | 1.0 | 1.0 |
| 46356 - 46402 | 1.0 | 1.0 | 1.0 |
| 46373 - 46402 | 1.0 | 0.707256 | 1.0 |
| 46375 - 46402 | 1.0 | 0.232196 | 1.0 |

**Table A15. Pairwise Comparisons of Significant Stroke Scale Scores by ZIP Code, Age-Adjusted.** Pairwise comparisons were conducted as a follow-up Dunn test with Bonferroni correction for significant Kruskal Wallis stroke scales. Discharge mRS is collected upon patient release. NIHSS (National Institute of Health Stroke Scale) data is collected upon patient admission (Initial) and release (Discharge).

|  | |  | **Pre-Stroke mRS** | **Discharge mRS** | **Initial NIHSS** | **Discharge NIHSS** |
| --- | --- | --- | --- | --- | --- | --- |
|  | **Median Household Income** | | | | | |
| **Pearson’s Correlation Coefficient (*r*)** | |  | -0.332471 | -0.557332 (Moderate) | -0.61045 (Moderate) | -0.3375368 (Low) |
| **t-statistic** | |  | -1.6535 | -3.2192 | -3.6962 | -1.7197 |
| **Degrees of Freedom** | |  | 22 | 23 | 23 | 23 |
| **Confidence Interval** | |  | -0.6488 to 0.0819 | -0.7806 to -0.2080 | -0.810 to -0.234 | -0.6465 to 0.0665 |
| ***p*-value** | |  | 0.1124 | 0.0038 | 0.001192 | 0.09892 |
|  | **Education Level (% Bachelor’s or Higher)** | | | | | |
| **Pearson’s Correlation Coefficient (*r*)** | |  | -0.1918277 | -0.6019654 (Moderate) | -0.7067 (Strong) | -0.4620383 (Low) |
| **t-statistic** | |  | -0.91678 | -3.6153 | -4.7903 | -2.4985 |
| **Degrees of Freedom** | |  | 22 | 23 | 23 | 23 |
| **Confidence Interval** | |  | -0.5525 to 0.2293 | -0.8055 to -0.2714 | -0.861 to -0.432 | -0.7248 to -0.0819 |
| ***p*-value** | |  | 0.3692 | 0.001454 | 0.7853E-05 | 0.02006 |
|  | **Minority Population (As Total % Hispanic, Black or African American, and Asian)** | | | | | |
| **Pearson’s Correlation Coefficient (*r*)** | |  | 0.3187058 | 0.401423 (Low) | 0.500004 (Moderate) | 0.2181353 (Low) |
| **t-statistic** | |  | 1.5771 | 2.1019 | 2.7689 | 1.072 |
| **Degrees of Freedom** | |  | 22 | 23 | 23 | 23 |
| **Confidence Interval** | |  | -0.0972 to 0.6398 | 0.0075 to 0.6875 | 0.1307 to 0.7475 | -0.1934 to 0.5646 |
| ***p*-value** | |  | 0.3187058 | 0.04671 | 0.0109 | 0.2949 |

**Table S16. Pearson’s Correlation Statistics for mRS and NIHSS by ZIP Code, Age-Adjusted.** mRS (modified Rankin Score) data is determined prior to stroke (Pre-Stroke) and upon patient release (Discharge). NIHSS (National Institute of Health Stroke Scale) data is collected upon patient admission (Initial) and release (Discharge). IQR (interquartile range). Includes patients who meet the following criteria: 1) they were not transferred from another hospital, and 2) they are residents of Lake County.

| **Payment Source** | **n** | **Mean Pre-Stroke mRS** | **Median Pre-Stroke mRS** | **IQR** | **Kruskal-Wallis X2 Statistic** | **Degrees of Freedom** | ***p*-value** |
| --- | --- | --- | --- | --- | --- | --- | --- |
| Medicaid - Private/HMO/PPO/Other | 58 | 0.293 | 0 | 0 | 38.7390 | 6.0 | 8.05E-07 |
| Medicaid Title 19 | 18 | 0.111 | 0 | 0 |
| Medicare - Private/HMO/PPO/Other | 173 | 0.630 | 0 | 1 |
| Medicare Title 18 | 225 | 0.809 | 0 | 1 |
| Other/Not Documented/UTD | 3 | 0.000 | 0 | 0 |
| Private/HMO/PPO/Other | 91 | 0.110 | 0 | 0 |
| Self-Pay/No Insurance | 9 | 0.111 | 0 | 0 |
| **Payment Source** | **n** | **Mean Discharge mRS** | **Median Discharge mRS** | **IQR** | **Kruskal-Wallis X2 Statistic** | **Degrees of Freedom** | ***p*-value** |
| Medicaid - Private/HMO/PPO/Other | 111 | 2.018 | 2 | 4 | 49.6570 | 6.0 | 5.509E-09 |
| Medicaid Title 19 | 58 | 2.552 | 3 | 3 |
| Medicare - Private/HMO/PPO/Other | 327 | 2.664 | 3 | 3 |
| Medicare Title 18 | 455 | 2.556 | 3 | 4 |
| Other/Not Documented/UTD | 8 | 2.750 | 1.5 | 5.25 |
| Private/HMO/PPO/Other | 155 | 1.503 | 1 | 3 |
| Self-Pay/No Insurance | 9 | 0.667 | 0 | 1 |
| **Payment Source** | **n** | **Mean Initial NIHSS** | **Median Initial NIHSS** | **IQR** | **Kruskal-Wallis X2 Statistic** | **Degrees of Freedom** | ***p*-value** |
| Medicaid - Private/HMO/PPO/Other | 128 | 6.078 | 2.5 | 8 | 28.4420 | 6.0 | 7.76E-05 |
| Medicaid Title 19 | 116 | 5.060 | 3 | 5.25 |
| Medicare - Private/HMO/PPO/Other | 432 | 6.815 | 3 | 8 |
| Medicare Title 18 | 566 | 5.753 | 2 | 7.75 |
| Other/Not Documented/UTD | 8 | 8.000 | 3.5 | 6.25 |
| Private/HMO/PPO/Other | 201 | 3.960 | 1 | 4 |
| Self-Pay/No Insurance | 16 | 4.250 | 1 | 3.5 |
| **Payment Source** | **n** | **Mean Discharge NIHSS** | **Median Discharge NIHSS** | **IQR** | **Kruskal-Wallis X2 Statistic** | **Degrees of Freedom** | ***p*-value** |
| Medicaid - Private/HMO/PPO/Other | 66 | 3.833 | 2 | 4 | 26.4670 | 6.0 | 1.82E-04 |
| Medicaid Title 19 | 66 | 3.697 | 1 | 3.75 |
| Medicare - Private/HMO/PPO/Other | 202 | 4.906 | 2 | 5 |
| Medicare Title 18 | 283 | 3.191 | 1 | 4 |
| Other/Not Documented/UTD | 4 | 0.500 | 0 | 0.5 |
| Private/HMO/PPO/Other | 114 | 2.132 | 1 | 3 |
| Self-Pay/No Insurance | 10 | 8.100 | 1.5 | 10.5 |

**Table S17. Descriptive and Kruskal Wallis Statistics for mRS and NIHSS Scores by Payment Source.** mRS (modified Rankin Score) data is determined prior to stroke (Pre-Stroke) and upon patient release (Discharge). NIHSS (National Institute of Health Stroke Scale) data is collected upon patient admission (Initial) and release (Discharge). IQR (interquartile range). Includes patients who meet the following criteria: 1) they were not transferred from another hospital, and 2) they are residents of Lake County. VA/CHAMPVA/Tricare Insurance group were excluded due to low n.

| **Pairwise Comparisons of Payment Source Types** | **Adjusted *p*-value for Pre-Stroke mRS** | **Adjusted *p*-value for Discharge mRS** | **Adjusted *p*-value for Initial NIHSS** | **Adjusted *p*-value for Discharge NIHSS** |
| --- | --- | --- | --- | --- |
| Medicaid - Private/HMO/PPO/Other - Medicaid Title 19 | 1.0 | 0.9997286000 | 1.0 | 1.0 |
| Medicaid - Private/HMO/PPO/Other - Medicare - Private/HMO/PPO/Other | 0.1418492000 | 0.0270899100 | 1.0 | 1.0 |
| Medicaid Title 19 - Medicare - Private/HMO/PPO/Other | 0.8238002000 | 1.0 | 1.0 | 1.0 |
| Medicaid - Private/HMO/PPO/Other - Medicare Title 18 | 0.0044174440 | 0.1068755000 | 1.0 | 1.0 |
| Medicaid Title 19 - Medicare Title 18 | 0.1905222000 | 1.0 | 1.0 | 1.0 |
| Medicare - Private/HMO/PPO/Other - Medicare Title 18 | 1.0 | 1.0 | 0.0288668700 | 0.0277772000 |
| Medicaid - Private/HMO/PPO/Other - Other/Not Documented/UTD | 1.0 | 1.0 | 1.0 | 0.9407274000 |
| Medicaid Title 19 - Other/Not Documented/UTD | 1.0 | 1.0 | 1.0 | 1.0 |
| Medicare - Private/HMO/PPO/Other - Other/Not Documented/UTD | 1.0 | 1.0 | 1.0 | 0.4303478000 |
| Medicare Title 18 - Other/Not Documented/UTD | 1.0 | 1.0 | 1.0 | 1.0 |
| Medicaid - Private/HMO/PPO/Other - Private/HMO/PPO/Other | 1.0 | 0.7184633000 | 0.0301137700 | 0.1340046000 |
| Medicaid Title 19 - Private/HMO/PPO/Other | 1.0 | 0.0124176500 | 0.1919280000 | 0.3669903000 |
| Medicare - Private/HMO/PPO/Other - Private/HMO/PPO/Other | 0.0012852340 | 9.06E-08 | 0.0000122747 | 3.65E-05 |
| Medicare Title 18 - Private/HMO/PPO/Other | 0.0000025528 | 7.11E-07 | 0.0676016100 | 0.1753204000 |
| Other/Not Documented/UTD - Private/HMO/PPO/Other | 1.0 | 1.0 | 0.7316242000 | 1.0 |
| Medicaid - Private/HMO/PPO/Other - Self-Pay/No Insurance | 1.0 | 0.5706512000 | 1.0 | 1.0 |
| Medicaid Title 19 - Self-Pay/No Insurance | 1.0 | 0.0911031300 | 1.0 | 1.0 |
| Medicare - Private/HMO/PPO/Other - Self-Pay/No Insurance | 1.0 | 0.0310342000 | 0.6145590000 | 1.0 |
| Medicare Title 18 - Self-Pay/No Insurance | 0.7794085000 | 0.0526904500 | 1.0 | 1.0 |
| Other/Not Documented/UTD - Self-Pay/No Insurance | 1.0 | 1.0 | 1.0 | 1.0 |
| Private/HMO/PPO/Other - Self-Pay/No Insurance | 1.0 | 1.0 | 1.0 | 1.0 |

**Table S18. Pairwise Comparisons of Significant Stroke Scale Scores by Payment Source.** Pairwise comparisons were conducted as a follow-up Dunn test with Bonferroni correction for significant Kruskal Wallis stroke scales. mRS (modified Rankin Score) data is collected prior to stroke (Pre-Stroke) and upon patient release (Discharge). NIHSS (National Institute of Health Stroke Scale) data is collected upon patient admission (Initial) and release (Discharge).

| **Mode** | **n** | **Mean Pre-Stroke mRS** | **Median Pre-Stroke mRS** | **IQR** | **MWU Test Statistic (W)** | ***p*-value** |
| --- | --- | --- | --- | --- | --- | --- |
| EMS from home/scene | 308 | 0.688 | 0.0 | 1.0 | 42519 | 0.008303 |
| Private transport/taxi/other from home/scene | 249 | 0.406 | 0.0 | 0.0 |
| **Mode** | **n** | **Mean Discharge MRS** | **Median Discharge MRS** | **IQR** | **MWU Test Statistic (W)** | ***p*-value** |
| EMS from home/scene | 589 | 3.088 | 4.0 | 4.0 | 210809 | 2.20E-16 |
| Private transport/taxi/other from home/scene | 507 | 1.611 | 1.0 | 3.0 |
| **Mode** | **n** | **Mean Initial NIHSS** | **Median Initial NIHSS** | **IQR** | **MWU Test Statistic (W)** | ***p*-value** |
| EMS from home/scene | 762 | 8.854 | 5.0 | 13.0 | 383875 | 2.20E-16 |
| Private transport/taxi/other from home/scene | 683 | 2.401 | 1.0 | 3.0 |
| **Mode** | **n** | **Mean Discharge NIHSS** | **Median Discharge NIHSS** | **IQR** | **MWU Test Statistic (W)** | ***p*-value** |
| EMS from home/scene | 333 | 5.547 | 2.0 | 7.0 | 86300 | 1.00E-13 |
| Private transport/taxi/other from home/scene | 395 | 2.056 | 1.0 | 3.0 |

**Table A18. Descriptive and Mann Whitney U Statistics of mRS and NIHSS Scores by Arrival Method.** NIHSS (National Institute of Health Stroke Scale) data is collected upon patient admission (Initial) and release (Discharge). mRS (modified Rankin Score) data is collected prior to stroke (Pre-Stroke) and upon patient release (Discharge). IQR (interquartile range). Includes patients who meet the following criteria: 1) they were not transferred from another hospital, and 2) they are residents of Lake County.

| **ZIP Code (ZCTA5)** | **Municipality** | **County** | **State** | **Non-Transfer Patient Count** | **Transfer Patient Count** |
| --- | --- | --- | --- | --- | --- |
| 46303 | Cedar Lake | Lake | IN | 17 | NA |
| 46304 | Chesterton | Porter | IN | 10 | 26 |
| 46307 | Crown Point | Lake | IN | 53 | 17 |
| 46310 | Demotte | Jasper | IN | 5 | 2 |
| 46311 | Dyer | Lake | IN | 58 | 13 |
| 46312 | East Chicago | Lake | IN | 163 | 31 |
| 46319 | Griffith | Lake | IN | 77 | 5 |
| 46320 | Hammond | Lake | IN | 73 | 3 |
| 46321 | Munster | Lake | IN | 139 | 6 |
| 46322 | Highland | Lake | IN | 115 | 3 |
| 46323 | Hammond | Lake | IN | 108 | 8 |
| 46324 | Hammond | Lake | IN | 110 | 4 |
| 46327 | Hammond | Lake | IN | 40 | 3 |
| 46341 | Hebron | Porter | IN | 12 | 8 |
| 46342 | Hobart | Lake | IN | 123 | 50 |
| 46347 | Kouts | Porter | IN | NA | 6 |
| 46350 | La Porte | La Porte | IN | NA | 47 |
| 46356 | Lowell | Lake | IN | 11 | 2 |
| 46360 | Michigan City | La Porte | IN | NA | 34 |
| 46366 | North Judson | Starke | IN | NA | 5 |
| 46368 | Portage | Porter | IN | 70 | 46 |
| 46373 | St. John | Lake | IN | 27 | 6 |
| 46375 | Schererville | Lake | IN | 70 | 12 |
| 46383 | Valparaiso | Porter | IN | 7 | 26 |
| 46385 | Valparaiso | Porter | IN | 47 | 38 |
| 46394 | Whiting | Lake | IN | 66 | 17 |
| 46402 | Gary | Lake | IN | 8 | 3 |
| 46403 | Gary | Lake | IN | 15 | 8 |
| 46404 | Gary | Lake | IN | 29 | 4 |
| 46405 | Lake Station | Lake | IN | 37 | 22 |
| 46406 | Gary | Lake | IN | 26 | 4 |
| 46407 | Gary | Lake | IN | 14 | 3 |
| 46408 | Gary | Lake | IN | 29 | 7 |
| 46409 | Gary | Lake | IN | 6 | NA |
| 46410 | Merrillville | Lake | IN | 65 | 16 |
| 46534 | Knox | Jasper | IN | NA | 15 |
| 60409 | Calumet City | Cook | IL | 70 | 10 |
| 60411 | Chicago Heights | Cook | IL | 27 | 14 |
| 60417 | Crete | Will | IL | 5 | 6 |
| 60419 | Dolton | Cook | IL | 13 | 4 |
| 60426 | Harvey | Cook | IL | 6 | NA |
| 60438 | Lansing | Cook | IL | 150 | 5 |
| 60473 | South Holland | Cook | IL | 18 | 2 |
| 60617 | Chicago | Cook | IL | 32 | 8 |
| 60628 | Chicago | Cook | IL | 9 | 2 |
| 60633 | Chicago | Cook | IL | 9 | 1 |

**Table S20.** Descriptive Statistics of Patient Transfer Status by ZIP Code. Includes patients who are residents of any of the 46 ZIP Codes described in the Expanded Analysis.

| **ZIP Code** | **Municipality** | **Pre-Stroke mRS** | | | | **Discharge mRS** | | | | **Initial NIHSS** | | | | | **Discharge NIHSS** | | | | |
| --- | --- | --- | --- | --- | --- | --- | --- | --- | --- | --- | --- | --- | --- | --- | --- | --- | --- | --- | --- |
| **n** | **Mean** | **Median** | **IQR** | **n** | **Mean** | **Median** | **IQR** | **n** | **Mean** | **Median** | **IQR** | **n** | | **Mean** | **Median** | **IQR** |
| 46303 | Cedar Lake | 7 | 0.2070 | 0.0 | 0.00 | 17 | 0.5502 | 0.0 | 0.74 | 17 | 2.7990 | 1.9 | 3.06 | 12 | | 1.5939 | 0.7 | 2.05 |
| 46304 | Chesterton | 1 | 0.0000 | 0.0 | 0.00 | 1 | 0.0000 | 0.0 | 0.00 | 10 | 0.7139 | 0.2 | 1.26 | 5 | | 0.3492 | 0.3 | 0.70 |
| 46307 | Crown Point | 10 | 0.5576 | 0.0 | 0.00 | 20 | 2.2632 | 1.4 | 2.47 | 53 | 3.4328 | 0.7 | 2.94 | 29 | | 3.7880 | 0.3 | 1.71 |
| 46310 | Demotte | 1 | 0.0000 | 0.0 | 0.00 | 2 | 0.0000 | 0.0 | 0.00 | 5 | 2.2820 | 1.9 | 3.43 | 4 | | 0.5686 | 0.1 | 0.65 |
| 46311 | Dyer | 30 | 0.2186 | 0.0 | 0.33 | 56 | 1.2506 | 0.7 | 1.51 | 58 | 3.4775 | 1.6 | 3.64 | 22 | | 1.1754 | 0.2 | 1.56 |
| 46312 | East Chicago | 62 | 0.3228 | 0.0 | 0.00 | 134 | 2.0482 | 1.4 | 2.96 | 163 | 6.1791 | 2.2 | 7.14 | 83 | | 5.8308 | 1.8 | 7.08 |
| 46319 | Griffith | 37 | 0.1760 | 0.0 | 0.00 | 70 | 2.3257 | 1.4 | 2.96 | 77 | 7.2863 | 2.8 | 7.41 | 35 | | 5.4879 | 1.4 | 7.05 |
| 46320 | Hammond | 33 | 0.1594 | 0.0 | 0.00 | 69 | 3.3222 | 2.0 | 5.08 | 73 | 8.9425 | 1.5 | 8.63 | 32 | | 3.9529 | 1.0 | 2.01 |
| 46321 | Munster | 76 | 0.3083 | 0.0 | 0.27 | 137 | 1.4816 | 0.7 | 1.77 | 139 | 3.1602 | 0.7 | 2.31 | 67 | | 1.2336 | 0.2 | 1.65 |
| 46322 | Highland | 54 | 0.2687 | 0.0 | 0.07 | 112 | 1.7844 | 0.9 | 1.64 | 115 | 3.8001 | 1.1 | 4.18 | 52 | | 1.4584 | 0.4 | 1.88 |
| 46323 | Hammond | 55 | 0.3193 | 0.0 | 0.00 | 100 | 2.0183 | 1.0 | 2.22 | 108 | 6.7572 | 2.0 | 6.61 | 52 | | 3.9833 | 1.4 | 3.53 |
| 46324 | Hammond | 52 | 0.3151 | 0.0 | 0.00 | 100 | 2.5058 | 1.4 | 2.96 | 110 | 7.4575 | 1.8 | 6.26 | 56 | | 2.3552 | 0.8 | 2.80 |
| 46327 | Hammond | 24 | 0.5380 | 0.0 | 0.00 | 31 | 2.4989 | 1.5 | 3.44 | 40 | 6.9756 | 2.9 | 9.86 | 17 | | 3.1700 | 1.0 | 4.20 |
| 46341 | Hebron | 1 | 0.0000 | 0.0 | 0.00 | 2 | 5.8662 | 5.9 | 5.87 | 12 | 3.2752 | 1.2 | 4.46 | 5 | | 6.3129 | 0.7 | 9.88 |
| 46342 | Hobart | 2 | 0.0000 | 0.0 | 0.00 | 8 | 3.1229 | 2.2 | 1.12 | 123 | 4.0297 | 1.8 | 4.10 | 74 | | 3.7917 | 1.3 | 5.55 |
| 46356 | Lowell | 5 | 0.1896 | 0.0 | 0.27 | 10 | 2.0095 | 1.1 | 3.10 | 11 | 3.5482 | 1.5 | 4.19 | 6 | | 6.5456 | 1.1 | 1.21 |
| 46368 | Portage | 4 | 0.3622 | 0.0 | 0.36 | 8 | 1.6130 | 1.6 | 2.96 | 70 | 3.8574 | 1.8 | 3.88 | 46 | | 3.8297 | 1.3 | 4.59 |
| 46373 | St. John | 11 | 0.2370 | 0.0 | 0.17 | 28 | 1.1843 | 0.7 | 1.25 | 27 | 1.9713 | 0.6 | 1.43 | 19 | | 1.2638 | 0.7 | 0.97 |
| 46375 | Schererville | 36 | 0.1333 | 0.0 | 0.02 | 72 | 1.1069 | 0.4 | 1.42 | 70 | 1.5652 | 0.5 | 1.73 | 43 | | 0.8382 | 0.0 | 0.84 |
| 46383 | Valparaiso | 3 | 0.0000 | 0.0 | 0.00 | 3 | 0.0000 | 0.0 | 0.00 | 7 | 0.7380 | 1.0 | 1.25 | 4 | | 0.5090 | 0.3 | 0.84 |
| 46385 | Valparaiso | 2 | 1.5896 | 1.6 | 1.59 | 7 | 4.1953 | 1.5 | 6.89 | 47 | 3.4433 | 1.0 | 3.15 | 33 | | 4.4813 | 1.4 | 4.89 |
| 46394 | Whiting | 21 | 0.5479 | 0.0 | 0.09 | 52 | 1.9918 | 1.0 | 1.97 | 66 | 8.0817 | 1.9 | 5.53 | 34 | | 6.1924 | 1.4 | 5.40 |
| 46402 | Gary | 1 | 1.4488 | 1.4 | 0.00 | 5 | 2.9019 | 1.0 | 1.48 | 8 | 6.2061 | 3.7 | 4.01 | 6 | | 3.1256 | 2.4 | 1.71 |
| 46403 | Gary | 2 | 1.7696 | 1.8 | 1.77 | 3 | 1.5755 | 0.7 | 1.63 | 15 | 2.4278 | 1.5 | 3.24 | 9 | | 1.9135 | 1.4 | 1.93 |
| 46404 | Gary | 14 | 0.4623 | 0.0 | 0.34 | 22 | 2.2107 | 1.1 | 2.83 | 29 | 3.6165 | 1.5 | 3.61 | 11 | | 2.1543 | 1.0 | 1.33 |
| 46405 | Lake Station | 2 | 1.0866 | 1.1 | 1.09 | 4 | 4.2126 | 4.4 | 0.94 | 37 | 8.3917 | 3.9 | 11.84 | 22 | | 6.2162 | 2.3 | 6.60 |
| 46406 | Gary | 14 | 0.2643 | 0.0 | 0.00 | 22 | 2.2760 | 1.4 | 2.14 | 26 | 6.6711 | 3.9 | 6.81 | 13 | | 2.8303 | 1.8 | 2.96 |
| 46407 | Gary | 4 | 0.0000 | 0.0 | 0.00 | 7 | 2.6804 | 0.7 | 2.18 | 14 | 6.9145 | 1.0 | 5.16 | 9 | | 3.8679 | 3.7 | 5.22 |
| 46408 | Gary | 14 | 0.7680 | 0.0 | 0.51 | 21 | 1.6432 | 0.5 | 1.39 | 29 | 5.8617 | 1.9 | 5.53 | 12 | | 1.7690 | 0.5 | 1.98 |
| 46409 | Gary | 0 | NA | NA | NA | 2 | 2.8306 | 2.8 | 0.88 | 6 | 5.5369 | 0.2 | 11.66 | 1 | | 7.3957 | 7.4 | 0.00 |
| 46410 | Merrillville | 14 | 0.2200 | 0.0 | 0.13 | 25 | 1.3660 | 0.5 | 1.68 | 65 | 3.4777 | 0.7 | 3.80 | 35 | | 2.6643 | 0.3 | 2.53 |
| 60409 | Calumet City | 47 | 0.7311 | 0.0 | 0.52 | 70 | 2.9304 | 2.0 | 3.56 | 70 | 7.7352 | 3.2 | 7.26 | 25 | | 2.2908 | 0.7 | 2.10 |
| 60411 | Chicago Heights | 16 | 0.2767 | 0.0 | 0.34 | 25 | 1.1150 | 0.0 | 1.48 | 27 | 5.3560 | 2.8 | 5.82 | 16 | | 3.9007 | 0.1 | 2.51 |
| 60417 | Crete | 3 | 0.0000 | 0.0 | 0.00 | 5 | 2.5789 | 0.4 | 1.12 | 5 | 9.5441 | 0.3 | 0.02 | 1 | | 0.0000 | 0.0 | 0.00 |
| 60419 | Dolton | 6 | 1.5882 | 0.0 | 0.51 | 15 | 3.5570 | 1.7 | 4.24 | 13 | 6.0472 | 2.8 | 5.08 | 6 | | 2.5500 | 2.5 | 2.25 |
| 60426 | Harvey | 5 | 0.2898 | 0.0 | 0.00 | 5 | 2.9343 | 2.2 | 2.22 | 6 | 16.012 | 5.3 | 18.61 | 2 | | 0.8655 | 0.9 | 0.54 |
| 60438 | Lansing | 74 | 0.6247 | 0.0 | 0.68 | 148 | 2.1259 | 1.4 | 2.87 | 150 | 5.8149 | 2.2 | 5.16 | 80 | | 2.2016 | 1.8 | 2.90 |
| 60473 | South Holland | 8 | 0.1811 | 0.0 | 0.00 | 18 | 2.3097 | 3.0 | 3.84 | 18 | 3.6143 | 1.7 | 3.44 | 8 | | 2.9203 | 2.1 | 3.02 |
| 60617 | Chicago | 19 | 0.0795 | 0.0 | 0.00 | 26 | 2.1330 | 0.4 | 2.16 | 32 | 7.2895 | 1.7 | 6.49 | 18 | | 2.1015 | 1.3 | 3.34 |
| 60628 | Chicago | 5 | 1.1590 | 0.0 | 2.90 | 9 | 4.6630 | 3.7 | 4.86 | 9 | 18.485 | 9.7 | 11.30 | 6 | | 13.198 | 6.6 | 5.37 |
| 60633 | Chicago | 5 | 1.8164 | 1.4 | 1.36 | 11 | 1.9527 | 1.4 | 0.80 | 9 | 2.5313 | 0.0 | 3.88 | 3 | | 3.2831 | 3.7 | 3.08 |
|  | | **Pre-Stroke mRS** | | | | **Discharge mRS** | | | | **Initial NIHSS** | | | | | **Discharge NIHSS** | | | | |
| **KW X2 Statistic** | | 40.6590 | | | | 79.3210 | | | | 125.5000 | | | | | 75.4920 | | | | |
| **Degrees of Freedom** | | 39 | | | | 40 | | | | 40 | | | | | 40 | | | | |
| ***p*-value** | | 0.397 | | | | 0.0002 | | | | 9.33E-11 | | | | | 0.000585 | | | | |

**Table S21. Descriptive and Kruskal Wallis Statistics of Non-Transfer mRS and NIHSS Scores by ZIP Code, Age-Adjusted.** mRS (modified Rankin Score) data is determined prior to stroke (Pre-Stroke) and upon patient release (Discharge). NIHSS (National Institute of Health Stroke Scale) data is collected upon patient admission (Initial) and release (Discharge). IQR (interquartile range). Includes patients who meet the following criteria: 1) they were not transferred from another hospital, and 2) they are residents of any of the 41 ZIP Codes described in the Expanded Analysis.

| **Pairwise Comparisons of ZIP Codes** | **Adjusted *p*-value for Discharge mRS** | **Adjusted *p*-value for Initial NIHSS** | **Adjusted *p*-value for Discharge NIHSS** |
| --- | --- | --- | --- |
| 46303 - 46304 | 1 | 1 | 1 |
| 46303 - 46307 | 1 | 1 | 1 |
| 46304 - 46307 | 1 | 1 | 1 |
| 46303 - 46310 | 1 | 1 | 1 |
| 46304 - 46310 | 1 | 1 | 1 |
| 46307 - 46310 | 1 | 1 | 1 |
| 46303 - 46311 | 1 | 1 | 1 |
| 46304 - 46311 | 1 | 1 | 1 |
| 46307 - 46311 | 1 | 1 | 1 |
| 46310 - 46311 | 1 | 1 | 1 |
| 46303 - 46312 | 1 | 1 | 1 |
| 46304 - 46312 | 1 | 1 | 1 |
| 46307 - 46312 | 1 | 0.312818 | 1 |
| 46310 - 46312 | 1 | 1 | 1 |
| 46311 - 46312 | 1 | 1 | 1 |
| 46303 - 46319 | 1 | 1 | 1 |
| 46304 - 46319 | 1 | 1 | 1 |
| 46307 - 46319 | 1 | 0.446348 | 1 |
| 46310 - 46319 | 1 | 1 | 1 |
| 46311 - 46319 | 1 | 1 | 1 |
| 46312 - 46319 | 1 | 1 | 1 |
| 46303 - 46320 | 1 | 1 | 1 |
| 46304 - 46320 | 1 | 1 | 1 |
| 46307 - 46320 | 1 | 1 | 1 |
| 46310 - 46320 | 1 | 1 | 1 |
| 46311 - 46320 | 1 | 1 | 1 |
| 46312 - 46320 | 1 | 1 | 1 |
| 46319 - 46320 | 1 | 1 | 1 |
| 46303 - 46321 | 1 | 1 | 1 |
| 46304 - 46321 | 1 | 1 | 1 |
| 46307 - 46321 | 1 | 1 | 1 |
| 46310 - 46321 | 1 | 1 | 1 |
| 46311 - 46321 | 1 | 1 | 1 |
| 46312 - 46321 | 1 | 0.005087 | 0.026649 |
| 46319 - 46321 | 1 | 0.037962 | 1 |
| 46320 - 46321 | 1 | 1 | 1 |
| 46303 - 46322 | 1 | 1 | 1 |
| 46304 - 46322 | 1 | 1 | 1 |
| 46307 - 46322 | 1 | 1 | 1 |
| 46310 - 46322 | 1 | 1 | 1 |
| 46311 - 46322 | 1 | 1 | 1 |
| 46312 - 46322 | 1 | 1 | 1 |
| 46319 - 46322 | 1 | 1 | 1 |
| 46320 - 46322 | 1 | 1 | 1 |
| 46321 - 46322 | 1 | 1 | 1 |
| 46303 - 46323 | 1 | 1 | 1 |
| 46304 - 46323 | 1 | 1 | 1 |
| 46307 - 46323 | 1 | 0.120367 | 1 |
| 46310 - 46323 | 1 | 1 | 1 |
| 46311 - 46323 | 1 | 1 | 1 |
| 46312 - 46323 | 1 | 1 | 1 |
| 46319 - 46323 | 1 | 1 | 1 |
| 46320 - 46323 | 1 | 1 | 1 |
| 46321 - 46323 | 1 | 0.002553 | 1 |
| 46322 - 46323 | 1 | 0.675925 | 1 |
| 46303 - 46324 | 1 | 1 | 1 |
| 46304 - 46324 | 1 | 1 | 1 |
| 46307 - 46324 | 1 | 1 | 1 |
| 46310 - 46324 | 1 | 1 | 1 |
| 46311 - 46324 | 1 | 1 | 1 |
| 46312 - 46324 | 1 | 1 | 1 |
| 46319 - 46324 | 1 | 1 | 1 |
| 46320 - 46324 | 1 | 1 | 1 |
| 46321 - 46324 | 1 | 0.774293 | 1 |
| 46322 - 46324 | 1 | 1 | 1 |
| 46323 - 46324 | 1 | 1 | 1 |
| 46303 - 46327 | 1 | 1 | 1 |
| 46304 - 46327 | 1 | 1 | 1 |
| 46307 - 46327 | 1 | 1 | 1 |
| 46310 - 46327 | 1 | 1 | 1 |
| 46311 - 46327 | 1 | 1 | 1 |
| 46312 - 46327 | 1 | 1 | 1 |
| 46319 - 46327 | 1 | 1 | 1 |
| 46320 - 46327 | 1 | 1 | 1 |
| 46321 - 46327 | 1 | 1 | 1 |
| 46322 - 46327 | 1 | 1 | 1 |
| 46323 - 46327 | 1 | 1 | 1 |
| 46324 - 46327 | 1 | 1 | 1 |
| 46303 - 46341 | 1 | 1 | 1 |
| 46304 - 46341 | 1 | 1 | 1 |
| 46307 - 46341 | 1 | 1 | 1 |
| 46310 - 46341 | 1 | 1 | 1 |
| 46311 - 46341 | 1 | 1 | 1 |
| 46312 - 46341 | 1 | 1 | 1 |
| 46319 - 46341 | 1 | 1 | 1 |
| 46320 - 46341 | 1 | 1 | 1 |
| 46321 - 46341 | 1 | 1 | 1 |
| 46322 - 46341 | 1 | 1 | 1 |
| 46323 - 46341 | 1 | 1 | 1 |
| 46324 - 46341 | 1 | 1 | 1 |
| 46327 - 46341 | 1 | 1 | 1 |
| 46303 - 46342 | 1 | 1 | 1 |
| 46304 - 46342 | 1 | 1 | 1 |
| 46307 - 46342 | 1 | 1 | 1 |
| 46310 - 46342 | 1 | 1 | 1 |
| 46311 - 46342 | 1 | 1 | 1 |
| 46312 - 46342 | 1 | 1 | 1 |
| 46319 - 46342 | 1 | 1 | 1 |
| 46320 - 46342 | 1 | 1 | 1 |
| 46321 - 46342 | 1 | 1 | 0.977821 |
| 46322 - 46342 | 1 | 1 | 1 |
| 46323 - 46342 | 1 | 1 | 1 |
| 46324 - 46342 | 1 | 1 | 1 |
| 46327 - 46342 | 1 | 1 | 1 |
| 46341 - 46342 | 1 | 1 | 1 |
| 46303 - 46356 | 1 | 1 | 1 |
| 46304 - 46356 | 1 | 1 | 1 |
| 46307 - 46356 | 1 | 1 | 1 |
| 46310 - 46356 | 1 | 1 | 1 |
| 46311 - 46356 | 1 | 1 | 1 |
| 46312 - 46356 | 1 | 1 | 1 |
| 46319 - 46356 | 1 | 1 | 1 |
| 46320 - 46356 | 1 | 1 | 1 |
| 46321 - 46356 | 1 | 1 | 1 |
| 46322 - 46356 | 1 | 1 | 1 |
| 46323 - 46356 | 1 | 1 | 1 |
| 46324 - 46356 | 1 | 1 | 1 |
| 46327 - 46356 | 1 | 1 | 1 |
| 46341 - 46356 | 1 | 1 | 1 |
| 46342 - 46356 | 1 | 1 | 1 |
| 46303 - 46368 | 1 | 1 | 1 |
| 46304 - 46368 | 1 | 1 | 1 |
| 46307 - 46368 | 1 | 1 | 1 |
| 46310 - 46368 | 1 | 1 | 1 |
| 46311 - 46368 | 1 | 1 | 1 |
| 46312 - 46368 | 1 | 1 | 1 |
| 46319 - 46368 | 1 | 1 | 1 |
| 46320 - 46368 | 1 | 1 | 1 |
| 46321 - 46368 | 1 | 1 | 1 |
| 46322 - 46368 | 1 | 1 | 1 |
| 46323 - 46368 | 1 | 1 | 1 |
| 46324 - 46368 | 1 | 1 | 1 |
| 46327 - 46368 | 1 | 1 | 1 |
| 46341 - 46368 | 1 | 1 | 1 |
| 46342 - 46368 | 1 | 1 | 1 |
| 46356 - 46368 | 1 | 1 | 1 |
| 46303 - 46373 | 1 | 1 | 1 |
| 46304 - 46373 | 1 | 1 | 1 |
| 46307 - 46373 | 1 | 1 | 1 |
| 46310 - 46373 | 1 | 1 | 1 |
| 46311 - 46373 | 1 | 1 | 1 |
| 46312 - 46373 | 1 | 0.473712 | 1 |
| 46319 - 46373 | 1 | 0.479875 | 1 |
| 46320 - 46373 | 1 | 1 | 1 |
| 46321 - 46373 | 1 | 1 | 1 |
| 46322 - 46373 | 1 | 1 | 1 |
| 46323 - 46373 | 1 | 0.200373 | 1 |
| 46324 - 46373 | 1 | 1 | 1 |
| 46327 - 46373 | 1 | 1 | 1 |
| 46341 - 46373 | 1 | 1 | 1 |
| 46342 - 46373 | 1 | 1 | 1 |
| 46356 - 46373 | 1 | 1 | 1 |
| 46368 - 46373 | 1 | 1 | 1 |
| 46303 - 46375 | 1 | 1 | 1 |
| 46304 - 46375 | 1 | 1 | 1 |
| 46307 - 46375 | 1 | 1 | 1 |
| 46310 - 46375 | 1 | 1 | 1 |
| 46311 - 46375 | 1 | 1 | 1 |
| 46312 - 46375 | 1 | 0.00022 | 0.003366 |
| 46319 - 46375 | 1 | 0.001393 | 1 |
| 46320 - 46375 | 1 | 0.078978 | 1 |
| 46321 - 46375 | 1 | 1 | 1 |
| 46322 - 46375 | 1 | 1 | 1 |
| 46323 - 46375 | 1 | 0.000103 | 0.883698 |
| 46324 - 46375 | 1 | 0.028424 | 1 |
| 46327 - 46375 | 1 | 0.175303 | 1 |
| 46341 - 46375 | 1 | 1 | 1 |
| 46342 - 46375 | 1 | 0.122466 | 0.120531 |
| 46356 - 46375 | 1 | 1 | 1 |
| 46368 - 46375 | 1 | 0.526851 | 0.460266 |
| 46373 - 46375 | 1 | 1 | 1 |
| 46303 - 46383 | 1 | 1 | 1 |
| 46304 - 46383 | 1 | 1 | 1 |
| 46307 - 46383 | 1 | 1 | 1 |
| 46310 - 46383 | 1 | 1 | 1 |
| 46311 - 46383 | 1 | 1 | 1 |
| 46312 - 46383 | 1 | 1 | 1 |
| 46319 - 46383 | 1 | 1 | 1 |
| 46320 - 46383 | 1 | 1 | 1 |
| 46321 - 46383 | 1 | 1 | 1 |
| 46322 - 46383 | 1 | 1 | 1 |
| 46323 - 46383 | 1 | 1 | 1 |
| 46324 - 46383 | 1 | 1 | 1 |
| 46327 - 46383 | 1 | 1 | 1 |
| 46341 - 46383 | 1 | 1 | 1 |
| 46342 - 46383 | 1 | 1 | 1 |
| 46356 - 46383 | 1 | 1 | 1 |
| 46368 - 46383 | 1 | 1 | 1 |
| 46373 - 46383 | 1 | 1 | 1 |
| 46375 - 46383 | 1 | 1 | 1 |
| 46303 - 46385 | 1 | 1 | 1 |
| 46304 - 46385 | 1 | 1 | 1 |
| 46307 - 46385 | 1 | 1 | 1 |
| 46310 - 46385 | 1 | 1 | 1 |
| 46311 - 46385 | 1 | 1 | 1 |
| 46312 - 46385 | 1 | 1 | 1 |
| 46319 - 46385 | 1 | 1 | 1 |
| 46320 - 46385 | 1 | 1 | 1 |
| 46321 - 46385 | 1 | 1 | 0.341046 |
| 46322 - 46385 | 1 | 1 | 1 |
| 46323 - 46385 | 1 | 1 | 1 |
| 46324 - 46385 | 1 | 1 | 1 |
| 46327 - 46385 | 1 | 1 | 1 |
| 46341 - 46385 | 1 | 1 | 1 |
| 46342 - 46385 | 1 | 1 | 1 |
| 46356 - 46385 | 1 | 1 | 1 |
| 46368 - 46385 | 1 | 1 | 1 |
| 46373 - 46385 | 1 | 1 | 1 |
| 46375 - 46385 | 1 | 1 | 0.046961 |
| 46383 - 46385 | 1 | 1 | 1 |
| 46303 - 46394 | 1 | 1 | 1 |
| 46304 - 46394 | 1 | 1 | 1 |
| 46307 - 46394 | 1 | 1 | 1 |
| 46310 - 46394 | 1 | 1 | 1 |
| 46311 - 46394 | 1 | 1 | 1 |
| 46312 - 46394 | 1 | 1 | 1 |
| 46319 - 46394 | 1 | 1 | 1 |
| 46320 - 46394 | 1 | 1 | 1 |
| 46321 - 46394 | 1 | 1 | 1 |
| 46322 - 46394 | 1 | 1 | 1 |
| 46323 - 46394 | 1 | 1 | 1 |
| 46324 - 46394 | 1 | 1 | 1 |
| 46327 - 46394 | 1 | 1 | 1 |
| 46341 - 46394 | 1 | 1 | 1 |
| 46342 - 46394 | 1 | 1 | 1 |
| 46356 - 46394 | 1 | 1 | 1 |
| 46368 - 46394 | 1 | 1 | 1 |
| 46373 - 46394 | 1 | 1 | 1 |
| 46375 - 46394 | 1 | 0.108844 | 1 |
| 46383 - 46394 | 1 | 1 | 1 |
| 46385 - 46394 | 1 | 1 | 1 |
| 46303 - 46402 | 1 | 1 | 1 |
| 46304 - 46402 | 1 | 1 | 1 |
| 46307 - 46402 | 1 | 1 | 1 |
| 46310 - 46402 | 1 | 1 | 1 |
| 46311 - 46402 | 1 | 1 | 1 |
| 46312 - 46402 | 1 | 1 | 1 |
| 46319 - 46402 | 1 | 1 | 1 |
| 46320 - 46402 | 1 | 1 | 1 |
| 46321 - 46402 | 1 | 1 | 1 |
| 46322 - 46402 | 1 | 1 | 1 |
| 46323 - 46402 | 1 | 1 | 1 |
| 46324 - 46402 | 1 | 1 | 1 |
| 46327 - 46402 | 1 | 1 | 1 |
| 46341 - 46402 | 1 | 1 | 1 |
| 46342 - 46402 | 1 | 1 | 1 |
| 46356 - 46402 | 1 | 1 | 1 |
| 46368 - 46402 | 1 | 1 | 1 |
| 46373 - 46402 | 1 | 1 | 1 |
| 46375 - 46402 | 1 | 0.612913 | 1 |
| 46383 - 46402 | 1 | 1 | 1 |
| 46385 - 46402 | 1 | 1 | 1 |
| 46394 - 46402 | 1 | 1 | 1 |
| 46303 - 46403 | 1 | 1 | 1 |
| 46304 - 46403 | 1 | 1 | 1 |
| 46307 - 46403 | 1 | 1 | 1 |
| 46310 - 46403 | 1 | 1 | 1 |
| 46311 - 46403 | 1 | 1 | 1 |
| 46312 - 46403 | 1 | 1 | 1 |
| 46319 - 46403 | 1 | 1 | 1 |
| 46320 - 46403 | 1 | 1 | 1 |
| 46321 - 46403 | 1 | 1 | 1 |
| 46322 - 46403 | 1 | 1 | 1 |
| 46323 - 46403 | 1 | 1 | 1 |
| 46324 - 46403 | 1 | 1 | 1 |
| 46327 - 46403 | 1 | 1 | 1 |
| 46341 - 46403 | 1 | 1 | 1 |
| 46342 - 46403 | 1 | 1 | 1 |
| 46356 - 46403 | 1 | 1 | 1 |
| 46368 - 46403 | 1 | 1 | 1 |
| 46373 - 46403 | 1 | 1 | 1 |
| 46375 - 46403 | 1 | 1 | 1 |
| 46383 - 46403 | 1 | 1 | 1 |
| 46385 - 46403 | 1 | 1 | 1 |
| 46394 - 46403 | 1 | 1 | 1 |
| 46402 - 46403 | 1 | 1 | 1 |
| 46303 - 46404 | 1 | 1 | 1 |
| 46304 - 46404 | 1 | 1 | 1 |
| 46307 - 46404 | 1 | 1 | 1 |
| 46310 - 46404 | 1 | 1 | 1 |
| 46311 - 46404 | 1 | 1 | 1 |
| 46312 - 46404 | 1 | 1 | 1 |
| 46319 - 46404 | 1 | 1 | 1 |
| 46320 - 46404 | 1 | 1 | 1 |
| 46321 - 46404 | 1 | 1 | 1 |
| 46322 - 46404 | 1 | 1 | 1 |
| 46323 - 46404 | 1 | 1 | 1 |
| 46324 - 46404 | 1 | 1 | 1 |
| 46327 - 46404 | 1 | 1 | 1 |
| 46341 - 46404 | 1 | 1 | 1 |
| 46342 - 46404 | 1 | 1 | 1 |
| 46356 - 46404 | 1 | 1 | 1 |
| 46368 - 46404 | 1 | 1 | 1 |
| 46373 - 46404 | 1 | 1 | 1 |
| 46375 - 46404 | 1 | 1 | 1 |
| 46383 - 46404 | 1 | 1 | 1 |
| 46385 - 46404 | 1 | 1 | 1 |
| 46394 - 46404 | 1 | 1 | 1 |
| 46402 - 46404 | 1 | 1 | 1 |
| 46403 - 46404 | 1 | 1 | 1 |
| 46303 - 46405 | 1 | 1 | 1 |
| 46304 - 46405 | 1 | 0.432117 | 1 |
| 46307 - 46405 | 1 | 0.030772 | 1 |
| 46310 - 46405 | 1 | 1 | 1 |
| 46311 - 46405 | 1 | 0.720539 | 1 |
| 46312 - 46405 | 1 | 1 | 1 |
| 46319 - 46405 | 1 | 1 | 1 |
| 46320 - 46405 | 1 | 1 | 1 |
| 46321 - 46405 | 1 | 0.003757 | 0.443624 |
| 46322 - 46405 | 1 | 0.186229 | 1 |
| 46323 - 46405 | 1 | 1 | 1 |
| 46324 - 46405 | 1 | 1 | 1 |
| 46327 - 46405 | 1 | 1 | 1 |
| 46341 - 46405 | 1 | 1 | 1 |
| 46342 - 46405 | 1 | 1 | 1 |
| 46356 - 46405 | 1 | 1 | 1 |
| 46368 - 46405 | 1 | 1 | 1 |
| 46373 - 46405 | 1 | 0.036854 | 1 |
| 46375 - 46405 | 1 | 0.000155 | 0.070198 |
| 46383 - 46405 | 1 | 1 | 1 |
| 46385 - 46405 | 1 | 1 | 1 |
| 46394 - 46405 | 1 | 1 | 1 |
| 46402 - 46405 | 1 | 1 | 1 |
| 46403 - 46405 | 1 | 1 | 1 |
| 46404 - 46405 | 1 | 1 | 1 |
| 46303 - 46406 | 1 | 1 | 1 |
| 46304 - 46406 | 1 | 1 | 1 |
| 46307 - 46406 | 1 | 1 | 1 |
| 46310 - 46406 | 1 | 1 | 1 |
| 46311 - 46406 | 1 | 1 | 1 |
| 46312 - 46406 | 1 | 1 | 1 |
| 46319 - 46406 | 1 | 1 | 1 |
| 46320 - 46406 | 1 | 1 | 1 |
| 46321 - 46406 | 1 | 1 | 1 |
| 46322 - 46406 | 1 | 1 | 1 |
| 46323 - 46406 | 1 | 1 | 1 |
| 46324 - 46406 | 1 | 1 | 1 |
| 46327 - 46406 | 1 | 1 | 1 |
| 46341 - 46406 | 1 | 1 | 1 |
| 46342 - 46406 | 1 | 1 | 1 |
| 46356 - 46406 | 1 | 1 | 1 |
| 46368 - 46406 | 1 | 1 | 1 |
| 46373 - 46406 | 1 | 1 | 1 |
| 46375 - 46406 | 1 | 0.256093 | 1 |
| 46383 - 46406 | 1 | 1 | 1 |
| 46385 - 46406 | 1 | 1 | 1 |
| 46394 - 46406 | 1 | 1 | 1 |
| 46402 - 46406 | 1 | 1 | 1 |
| 46403 - 46406 | 1 | 1 | 1 |
| 46404 - 46406 | 1 | 1 | 1 |
| 46405 - 46406 | 1 | 1 | 1 |
| 46303 - 46407 | 1 | 1 | 1 |
| 46304 - 46407 | 1 | 1 | 1 |
| 46307 - 46407 | 1 | 1 | 1 |
| 46310 - 46407 | 1 | 1 | 1 |
| 46311 - 46407 | 1 | 1 | 1 |
| 46312 - 46407 | 1 | 1 | 1 |
| 46319 - 46407 | 1 | 1 | 1 |
| 46320 - 46407 | 1 | 1 | 1 |
| 46321 - 46407 | 1 | 1 | 1 |
| 46322 - 46407 | 1 | 1 | 1 |
| 46323 - 46407 | 1 | 1 | 1 |
| 46324 - 46407 | 1 | 1 | 1 |
| 46327 - 46407 | 1 | 1 | 1 |
| 46341 - 46407 | 1 | 1 | 1 |
| 46342 - 46407 | 1 | 1 | 1 |
| 46356 - 46407 | 1 | 1 | 1 |
| 46368 - 46407 | 1 | 1 | 1 |
| 46373 - 46407 | 1 | 1 | 1 |
| 46375 - 46407 | 1 | 1 | 1 |
| 46383 - 46407 | 1 | 1 | 1 |
| 46385 - 46407 | 1 | 1 | 1 |
| 46394 - 46407 | 1 | 1 | 1 |
| 46402 - 46407 | 1 | 1 | 1 |
| 46403 - 46407 | 1 | 1 | 1 |
| 46404 - 46407 | 1 | 1 | 1 |
| 46405 - 46407 | 1 | 1 | 1 |
| 46406 - 46407 | 1 | 1 | 1 |
| 46303 - 46408 | 1 | 1 | 1 |
| 46304 - 46408 | 1 | 1 | 1 |
| 46307 - 46408 | 1 | 1 | 1 |
| 46310 - 46408 | 1 | 1 | 1 |
| 46311 - 46408 | 1 | 1 | 1 |
| 46312 - 46408 | 1 | 1 | 1 |
| 46319 - 46408 | 1 | 1 | 1 |
| 46320 - 46408 | 1 | 1 | 1 |
| 46321 - 46408 | 1 | 1 | 1 |
| 46322 - 46408 | 1 | 1 | 1 |
| 46323 - 46408 | 1 | 1 | 1 |
| 46324 - 46408 | 1 | 1 | 1 |
| 46327 - 46408 | 1 | 1 | 1 |
| 46341 - 46408 | 1 | 1 | 1 |
| 46342 - 46408 | 1 | 1 | 1 |
| 46356 - 46408 | 1 | 1 | 1 |
| 46368 - 46408 | 1 | 1 | 1 |
| 46373 - 46408 | 1 | 1 | 1 |
| 46375 - 46408 | 1 | 1 | 1 |
| 46383 - 46408 | 1 | 1 | 1 |
| 46385 - 46408 | 1 | 1 | 1 |
| 46394 - 46408 | 1 | 1 | 1 |
| 46402 - 46408 | 1 | 1 | 1 |
| 46403 - 46408 | 1 | 1 | 1 |
| 46404 - 46408 | 1 | 1 | 1 |
| 46405 - 46408 | 1 | 1 | 1 |
| 46406 - 46408 | 1 | 1 | 1 |
| 46407 - 46408 | 1 | 1 | 1 |
| 46303 - 46409 | 1 | 1 | 1 |
| 46304 - 46409 | 1 | 1 | 1 |
| 46307 - 46409 | 1 | 1 | 1 |
| 46310 - 46409 | 1 | 1 | 1 |
| 46311 - 46409 | 1 | 1 | 1 |
| 46312 - 46409 | 1 | 1 | 1 |
| 46319 - 46409 | 1 | 1 | 1 |
| 46320 - 46409 | 1 | 1 | 1 |
| 46321 - 46409 | 1 | 1 | 1 |
| 46322 - 46409 | 1 | 1 | 1 |
| 46323 - 46409 | 1 | 1 | 1 |
| 46324 - 46409 | 1 | 1 | 1 |
| 46327 - 46409 | 1 | 1 | 1 |
| 46341 - 46409 | 1 | 1 | 1 |
| 46342 - 46409 | 1 | 1 | 1 |
| 46356 - 46409 | 1 | 1 | 1 |
| 46368 - 46409 | 1 | 1 | 1 |
| 46373 - 46409 | 1 | 1 | 1 |
| 46375 - 46409 | 1 | 1 | 1 |
| 46383 - 46409 | 1 | 1 | 1 |
| 46385 - 46409 | 1 | 1 | 1 |
| 46394 - 46409 | 1 | 1 | 1 |
| 46402 - 46409 | 1 | 1 | 1 |
| 46403 - 46409 | 1 | 1 | 1 |
| 46404 - 46409 | 1 | 1 | 1 |
| 46405 - 46409 | 1 | 1 | 1 |
| 46406 - 46409 | 1 | 1 | 1 |
| 46407 - 46409 | 1 | 1 | 1 |
| 46408 - 46409 | 1 | 1 | 1 |
| 46303 - 46410 | 1 | 1 | 1 |
| 46304 - 46410 | 1 | 1 | 1 |
| 46307 - 46410 | 1 | 1 | 1 |
| 46310 - 46410 | 1 | 1 | 1 |
| 46311 - 46410 | 1 | 1 | 1 |
| 46312 - 46410 | 1 | 1 | 1 |
| 46319 - 46410 | 1 | 1 | 1 |
| 46320 - 46410 | 1 | 1 | 1 |
| 46321 - 46410 | 1 | 1 | 1 |
| 46322 - 46410 | 1 | 1 | 1 |
| 46323 - 46410 | 1 | 0.523068 | 1 |
| 46324 - 46410 | 1 | 1 | 1 |
| 46327 - 46410 | 1 | 1 | 1 |
| 46341 - 46410 | 1 | 1 | 1 |
| 46342 - 46410 | 1 | 1 | 1 |
| 46356 - 46410 | 1 | 1 | 1 |
| 46368 - 46410 | 1 | 1 | 1 |
| 46373 - 46410 | 1 | 1 | 1 |
| 46375 - 46410 | 1 | 1 | 1 |
| 46383 - 46410 | 1 | 1 | 1 |
| 46385 - 46410 | 1 | 1 | 1 |
| 46394 - 46410 | 1 | 1 | 1 |
| 46402 - 46410 | 1 | 1 | 1 |
| 46403 - 46410 | 1 | 1 | 1 |
| 46404 - 46410 | 1 | 1 | 1 |
| 46405 - 46410 | 1 | 0.118065 | 1 |
| 46406 - 46410 | 1 | 1 | 1 |
| 46407 - 46410 | 1 | 1 | 1 |
| 46408 - 46410 | 1 | 1 | 1 |
| 46409 - 46410 | 1 | 1 | 1 |
| 46303 - 60409 | 0.111306 | 1 | 1 |
| 46304 - 60409 | 1 | 1 | 1 |
| 46307 - 60409 | 1 | 0.618701 | 1 |
| 46310 - 60409 | 1 | 1 | 1 |
| 46311 - 60409 | 1 | 1 | 1 |
| 46312 - 60409 | 1 | 1 | 1 |
| 46319 - 60409 | 1 | 1 | 1 |
| 46320 - 60409 | 1 | 1 | 1 |
| 46321 - 60409 | 1 | 0.071586 | 1 |
| 46322 - 60409 | 1 | 1 | 1 |
| 46323 - 60409 | 1 | 1 | 1 |
| 46324 - 60409 | 1 | 1 | 1 |
| 46327 - 60409 | 1 | 1 | 1 |
| 46341 - 60409 | 1 | 1 | 1 |
| 46342 - 60409 | 1 | 1 | 1 |
| 46356 - 60409 | 1 | 1 | 1 |
| 46368 - 60409 | 1 | 1 | 1 |
| 46373 - 60409 | 1 | 0.601009 | 1 |
| 46375 - 60409 | 0.082086 | 0.002694 | 1 |
| 46383 - 60409 | 1 | 1 | 1 |
| 46385 - 60409 | 1 | 1 | 1 |
| 46394 - 60409 | 1 | 1 | 1 |
| 46402 - 60409 | 1 | 1 | 1 |
| 46403 - 60409 | 1 | 1 | 1 |
| 46404 - 60409 | 1 | 1 | 1 |
| 46405 - 60409 | 1 | 1 | 1 |
| 46406 - 60409 | 1 | 1 | 1 |
| 46407 - 60409 | 1 | 1 | 1 |
| 46408 - 60409 | 1 | 1 | 1 |
| 46409 - 60409 | 1 | 1 | 1 |
| 46410 - 60409 | 1 | 1 | 1 |
| 46303 - 60411 | 1 | 1 | 1 |
| 46304 - 60411 | 1 | 1 | 1 |
| 46307 - 60411 | 1 | 1 | 1 |
| 46310 - 60411 | 1 | 1 | 1 |
| 46311 - 60411 | 1 | 1 | 1 |
| 46312 - 60411 | 1 | 1 | 1 |
| 46319 - 60411 | 1 | 1 | 1 |
| 46320 - 60411 | 0.289437 | 1 | 1 |
| 46321 - 60411 | 1 | 1 | 1 |
| 46322 - 60411 | 1 | 1 | 1 |
| 46323 - 60411 | 1 | 1 | 1 |
| 46324 - 60411 | 1 | 1 | 1 |
| 46327 - 60411 | 1 | 1 | 1 |
| 46341 - 60411 | 1 | 1 | 1 |
| 46342 - 60411 | 1 | 1 | 1 |
| 46356 - 60411 | 1 | 1 | 1 |
| 46368 - 60411 | 1 | 1 | 1 |
| 46373 - 60411 | 1 | 1 | 1 |
| 46375 - 60411 | 1 | 1 | 1 |
| 46383 - 60411 | 1 | 1 | 1 |
| 46385 - 60411 | 1 | 1 | 1 |
| 46394 - 60411 | 1 | 1 | 1 |
| 46402 - 60411 | 1 | 1 | 1 |
| 46403 - 60411 | 1 | 1 | 1 |
| 46404 - 60411 | 1 | 1 | 1 |
| 46405 - 60411 | 0.807814 | 1 | 1 |
| 46406 - 60411 | 1 | 1 | 1 |
| 46407 - 60411 | 1 | 1 | 1 |
| 46408 - 60411 | 1 | 1 | 1 |
| 46409 - 60411 | 1 | 1 | 1 |
| 46410 - 60411 | 1 | 1 | 1 |
| 60409 - 60411 | 0.215742 | 1 | 1 |
| 46303 - 60417 | 1 | 1 | 1 |
| 46304 - 60417 | 1 | 1 | 1 |
| 46307 - 60417 | 1 | 1 | 1 |
| 46310 - 60417 | 1 | 1 | 1 |
| 46311 - 60417 | 1 | 1 | 1 |
| 46312 - 60417 | 1 | 1 | 1 |
| 46319 - 60417 | 1 | 1 | 1 |
| 46320 - 60417 | 1 | 1 | 1 |
| 46321 - 60417 | 1 | 1 | 1 |
| 46322 - 60417 | 1 | 1 | 1 |
| 46323 - 60417 | 1 | 1 | 1 |
| 46324 - 60417 | 1 | 1 | 1 |
| 46327 - 60417 | 1 | 1 | 1 |
| 46341 - 60417 | 1 | 1 | 1 |
| 46342 - 60417 | 1 | 1 | 1 |
| 46356 - 60417 | 1 | 1 | 1 |
| 46368 - 60417 | 1 | 1 | 1 |
| 46373 - 60417 | 1 | 1 | 1 |
| 46375 - 60417 | 1 | 1 | 1 |
| 46383 - 60417 | 1 | 1 | 1 |
| 46385 - 60417 | 1 | 1 | 1 |
| 46394 - 60417 | 1 | 1 | 1 |
| 46402 - 60417 | 1 | 1 | 1 |
| 46403 - 60417 | 1 | 1 | 1 |
| 46404 - 60417 | 1 | 1 | 1 |
| 46405 - 60417 | 1 | 1 | 1 |
| 46406 - 60417 | 1 | 1 | 1 |
| 46407 - 60417 | 1 | 1 | 1 |
| 46408 - 60417 | 1 | 1 | 1 |
| 46409 - 60417 | 1 | 1 | 1 |
| 46410 - 60417 | 1 | 1 | 1 |
| 60409 - 60417 | 1 | 1 | 1 |
| 60411 - 60417 | 1 | 1 | 1 |
| 46303 - 60419 | 1 | 1 | 1 |
| 46304 - 60419 | 1 | 1 | 1 |
| 46307 - 60419 | 1 | 1 | 1 |
| 46310 - 60419 | 1 | 1 | 1 |
| 46311 - 60419 | 1 | 1 | 1 |
| 46312 - 60419 | 1 | 1 | 1 |
| 46319 - 60419 | 1 | 1 | 1 |
| 46320 - 60419 | 1 | 1 | 1 |
| 46321 - 60419 | 1 | 1 | 1 |
| 46322 - 60419 | 1 | 1 | 1 |
| 46323 - 60419 | 1 | 1 | 1 |
| 46324 - 60419 | 1 | 1 | 1 |
| 46327 - 60419 | 1 | 1 | 1 |
| 46341 - 60419 | 1 | 1 | 1 |
| 46342 - 60419 | 1 | 1 | 1 |
| 46356 - 60419 | 1 | 1 | 1 |
| 46368 - 60419 | 1 | 1 | 1 |
| 46373 - 60419 | 1 | 1 | 1 |
| 46375 - 60419 | 1 | 1 | 1 |
| 46383 - 60419 | 1 | 1 | 1 |
| 46385 - 60419 | 1 | 1 | 1 |
| 46394 - 60419 | 1 | 1 | 1 |
| 46402 - 60419 | 1 | 1 | 1 |
| 46403 - 60419 | 1 | 1 | 1 |
| 46404 - 60419 | 1 | 1 | 1 |
| 46405 - 60419 | 1 | 1 | 1 |
| 46406 - 60419 | 1 | 1 | 1 |
| 46407 - 60419 | 1 | 1 | 1 |
| 46408 - 60419 | 1 | 1 | 1 |
| 46409 - 60419 | 1 | 1 | 1 |
| 46410 - 60419 | 1 | 1 | 1 |
| 60409 - 60419 | 1 | 1 | 1 |
| 60411 - 60419 | 1 | 1 | 1 |
| 60417 - 60419 | 1 | 1 | 1 |
| 46303 - 60426 | 1 | 1 | 1 |
| 46304 - 60426 | 1 | 1 | 1 |
| 46307 - 60426 | 1 | 1 | 1 |
| 46310 - 60426 | 1 | 1 | 1 |
| 46311 - 60426 | 1 | 1 | 1 |
| 46312 - 60426 | 1 | 1 | 1 |
| 46319 - 60426 | 1 | 1 | 1 |
| 46320 - 60426 | 1 | 1 | 1 |
| 46321 - 60426 | 1 | 1 | 1 |
| 46322 - 60426 | 1 | 1 | 1 |
| 46323 - 60426 | 1 | 1 | 1 |
| 46324 - 60426 | 1 | 1 | 1 |
| 46327 - 60426 | 1 | 1 | 1 |
| 46341 - 60426 | 1 | 1 | 1 |
| 46342 - 60426 | 1 | 1 | 1 |
| 46356 - 60426 | 1 | 1 | 1 |
| 46368 - 60426 | 1 | 1 | 1 |
| 46373 - 60426 | 1 | 1 | 1 |
| 46375 - 60426 | 1 | 1 | 1 |
| 46383 - 60426 | 1 | 1 | 1 |
| 46385 - 60426 | 1 | 1 | 1 |
| 46394 - 60426 | 1 | 1 | 1 |
| 46402 - 60426 | 1 | 1 | 1 |
| 46403 - 60426 | 1 | 1 | 1 |
| 46404 - 60426 | 1 | 1 | 1 |
| 46405 - 60426 | 1 | 1 | 1 |
| 46406 - 60426 | 1 | 1 | 1 |
| 46407 - 60426 | 1 | 1 | 1 |
| 46408 - 60426 | 1 | 1 | 1 |
| 46409 - 60426 | 1 | 1 | 1 |
| 46410 - 60426 | 1 | 1 | 1 |
| 60409 - 60426 | 1 | 1 | 1 |
| 60411 - 60426 | 1 | 1 | 1 |
| 60417 - 60426 | 1 | 1 | 1 |
| 60419 - 60426 | 1 | 1 | 1 |
| 46303 - 60438 | 0.953653 | 1 | 1 |
| 46304 - 60438 | 1 | 1 | 1 |
| 46307 - 60438 | 1 | 0.223061 | 1 |
| 46310 - 60438 | 1 | 1 | 1 |
| 46311 - 60438 | 1 | 1 | 1 |
| 46312 - 60438 | 1 | 1 | 1 |
| 46319 - 60438 | 1 | 1 | 1 |
| 46320 - 60438 | 1 | 1 | 1 |
| 46321 - 60438 | 1 | 0.003383 | 1 |
| 46322 - 60438 | 1 | 1 | 1 |
| 46323 - 60438 | 1 | 1 | 1 |
| 46324 - 60438 | 1 | 1 | 1 |
| 46327 - 60438 | 1 | 1 | 1 |
| 46341 - 60438 | 1 | 1 | 1 |
| 46342 - 60438 | 1 | 1 | 1 |
| 46356 - 60438 | 1 | 1 | 1 |
| 46368 - 60438 | 1 | 1 | 1 |
| 46373 - 60438 | 1 | 0.359626 | 1 |
| 46375 - 60438 | 1 | 0.000147 | 0.145609 |
| 46383 - 60438 | 1 | 1 | 1 |
| 46385 - 60438 | 1 | 1 | 1 |
| 46394 - 60438 | 1 | 1 | 1 |
| 46402 - 60438 | 1 | 1 | 1 |
| 46403 - 60438 | 1 | 1 | 1 |
| 46404 - 60438 | 1 | 1 | 1 |
| 46405 - 60438 | 1 | 1 | 1 |
| 46406 - 60438 | 1 | 1 | 1 |
| 46407 - 60438 | 1 | 1 | 1 |
| 46408 - 60438 | 1 | 1 | 1 |
| 46409 - 60438 | 1 | 1 | 1 |
| 46410 - 60438 | 1 | 0.97889 | 1 |
| 60409 - 60438 | 1 | 1 | 1 |
| 60411 - 60438 | 1 | 1 | 1 |
| 60417 - 60438 | 1 | 1 | 1 |
| 60419 - 60438 | 1 | 1 | 1 |
| 60426 - 60438 | 1 | 1 | 1 |
| 46303 - 60473 | 1 | 1 | 1 |
| 46304 - 60473 | 1 | 1 | 1 |
| 46307 - 60473 | 1 | 1 | 1 |
| 46310 - 60473 | 1 | 1 | 1 |
| 46311 - 60473 | 1 | 1 | 1 |
| 46312 - 60473 | 1 | 1 | 1 |
| 46319 - 60473 | 1 | 1 | 1 |
| 46320 - 60473 | 1 | 1 | 1 |
| 46321 - 60473 | 1 | 1 | 1 |
| 46322 - 60473 | 1 | 1 | 1 |
| 46323 - 60473 | 1 | 1 | 1 |
| 46324 - 60473 | 1 | 1 | 1 |
| 46327 - 60473 | 1 | 1 | 1 |
| 46341 - 60473 | 1 | 1 | 1 |
| 46342 - 60473 | 1 | 1 | 1 |
| 46356 - 60473 | 1 | 1 | 1 |
| 46368 - 60473 | 1 | 1 | 1 |
| 46373 - 60473 | 1 | 1 | 1 |
| 46375 - 60473 | 1 | 1 | 1 |
| 46383 - 60473 | 1 | 1 | 1 |
| 46385 - 60473 | 1 | 1 | 1 |
| 46394 - 60473 | 1 | 1 | 1 |
| 46402 - 60473 | 1 | 1 | 1 |
| 46403 - 60473 | 1 | 1 | 1 |
| 46404 - 60473 | 1 | 1 | 1 |
| 46405 - 60473 | 1 | 1 | 1 |
| 46406 - 60473 | 1 | 1 | 1 |
| 46407 - 60473 | 1 | 1 | 1 |
| 46408 - 60473 | 1 | 1 | 1 |
| 46409 - 60473 | 1 | 1 | 1 |
| 46410 - 60473 | 1 | 1 | 1 |
| 60409 - 60473 | 1 | 1 | 1 |
| 60411 - 60473 | 1 | 1 | 1 |
| 60417 - 60473 | 1 | 1 | 1 |
| 60419 - 60473 | 1 | 1 | 1 |
| 60426 - 60473 | 1 | 1 | 1 |
| 60438 - 60473 | 1 | 1 | 1 |
| 46303 - 60617 | 1 | 1 | 1 |
| 46304 - 60617 | 1 | 1 | 1 |
| 46307 - 60617 | 1 | 1 | 1 |
| 46310 - 60617 | 1 | 1 | 1 |
| 46311 - 60617 | 1 | 1 | 1 |
| 46312 - 60617 | 1 | 1 | 1 |
| 46319 - 60617 | 1 | 1 | 1 |
| 46320 - 60617 | 1 | 1 | 1 |
| 46321 - 60617 | 1 | 1 | 1 |
| 46322 - 60617 | 1 | 1 | 1 |
| 46323 - 60617 | 1 | 1 | 1 |
| 46324 - 60617 | 1 | 1 | 1 |
| 46327 - 60617 | 1 | 1 | 1 |
| 46341 - 60617 | 1 | 1 | 1 |
| 46342 - 60617 | 1 | 1 | 1 |
| 46356 - 60617 | 1 | 1 | 1 |
| 46368 - 60617 | 1 | 1 | 1 |
| 46373 - 60617 | 1 | 1 | 1 |
| 46375 - 60617 | 1 | 1 | 1 |
| 46383 - 60617 | 1 | 1 | 1 |
| 46385 - 60617 | 1 | 1 | 1 |
| 46394 - 60617 | 1 | 1 | 1 |
| 46402 - 60617 | 1 | 1 | 1 |
| 46403 - 60617 | 1 | 1 | 1 |
| 46404 - 60617 | 1 | 1 | 1 |
| 46405 - 60617 | 1 | 1 | 1 |
| 46406 - 60617 | 1 | 1 | 1 |
| 46407 - 60617 | 1 | 1 | 1 |
| 46408 - 60617 | 1 | 1 | 1 |
| 46409 - 60617 | 1 | 1 | 1 |
| 46410 - 60617 | 1 | 1 | 1 |
| 60409 - 60617 | 1 | 1 | 1 |
| 60411 - 60617 | 1 | 1 | 1 |
| 60417 - 60617 | 1 | 1 | 1 |
| 60419 - 60617 | 1 | 1 | 1 |
| 60426 - 60617 | 1 | 1 | 1 |
| 60438 - 60617 | 1 | 1 | 1 |
| 60473 - 60617 | 1 | 1 | 1 |
| 46303 - 60628 | 0.05644 | 1 | 1 |
| 46304 - 60628 | 1 | 0.037856 | 1 |
| 46307 - 60628 | 1 | 0.01712 | 1 |
| 46310 - 60628 | 1 | 1 | 1 |
| 46311 - 60628 | 1 | 0.134068 | 0.426013 |
| 46312 - 60628 | 1 | 1 | 1 |
| 46319 - 60628 | 1 | 1 | 1 |
| 46320 - 60628 | 1 | 1 | 1 |
| 46321 - 60628 | 1 | 0.010263 | 0.236727 |
| 46322 - 60628 | 1 | 0.077931 | 0.802549 |
| 46323 - 60628 | 1 | 1 | 1 |
| 46324 - 60628 | 1 | 0.978276 | 1 |
| 46327 - 60628 | 1 | 1 | 1 |
| 46341 - 60628 | 1 | 1 | 1 |
| 46342 - 60628 | 1 | 0.484518 | 1 |
| 46356 - 60628 | 1 | 1 | 1 |
| 46368 - 60628 | 1 | 0.658094 | 1 |
| 46373 - 60628 | 1 | 0.010491 | 1 |
| 46375 - 60628 | 0.251172 | 0.001111 | 0.063449 |
| 46383 - 60628 | 0.513846 | 0.148594 | 1 |
| 46385 - 60628 | 1 | 0.426567 | 1 |
| 46394 - 60628 | 1 | 1 | 1 |
| 46402 - 60628 | 1 | 1 | 1 |
| 46403 - 60628 | 1 | 1 | 1 |
| 46404 - 60628 | 1 | 0.500268 | 1 |
| 46405 - 60628 | 1 | 1 | 1 |
| 46406 - 60628 | 1 | 1 | 1 |
| 46407 - 60628 | 1 | 1 | 1 |
| 46408 - 60628 | 0.853908 | 1 | 1 |
| 46409 - 60628 | 1 | 1 | 1 |
| 46410 - 60628 | 1 | 0.044988 | 1 |
| 60409 - 60628 | 1 | 1 | 1 |
| 60411 - 60628 | 0.136496 | 1 | 1 |
| 60417 - 60628 | 1 | 1 | 1 |
| 60419 - 60628 | 1 | 1 | 1 |
| 60426 - 60628 | 1 | 1 | 1 |
| 60438 - 60628 | 1 | 1 | 1 |
| 60473 - 60628 | 1 | 1 | 1 |
| 60617 - 60628 | 1 | 1 | 1 |
| 46303 - 60633 | 1 | 1 | 1 |
| 46304 - 60633 | 1 | 1 | 1 |
| 46307 - 60633 | 1 | 1 | 1 |
| 46310 - 60633 | 1 | 1 | 1 |
| 46311 - 60633 | 1 | 1 | 1 |
| 46312 - 60633 | 1 | 1 | 1 |
| 46319 - 60633 | 1 | 1 | 1 |
| 46320 - 60633 | 1 | 1 | 1 |
| 46321 - 60633 | 1 | 1 | 1 |
| 46322 - 60633 | 1 | 1 | 1 |
| 46323 - 60633 | 1 | 1 | 1 |
| 46324 - 60633 | 1 | 1 | 1 |
| 46327 - 60633 | 1 | 1 | 1 |
| 46341 - 60633 | 1 | 1 | 1 |
| 46342 - 60633 | 1 | 1 | 1 |
| 46356 - 60633 | 1 | 1 | 1 |
| 46368 - 60633 | 1 | 1 | 1 |
| 46373 - 60633 | 1 | 1 | 1 |
| 46375 - 60633 | 1 | 1 | 1 |
| 46383 - 60633 | 1 | 1 | 1 |
| 46385 - 60633 | 1 | 1 | 1 |
| 46394 - 60633 | 1 | 1 | 1 |
| 46402 - 60633 | 1 | 1 | 1 |
| 46403 - 60633 | 1 | 1 | 1 |
| 46404 - 60633 | 1 | 1 | 1 |
| 46405 - 60633 | 1 | 1 | 1 |
| 46406 - 60633 | 1 | 1 | 1 |
| 46407 - 60633 | 1 | 1 | 1 |
| 46408 - 60633 | 1 | 1 | 1 |
| 46409 - 60633 | 1 | 1 | 1 |
| 46410 - 60633 | 1 | 1 | 1 |
| 60409 - 60633 | 1 | 1 | 1 |
| 60411 - 60633 | 1 | 1 | 1 |
| 60417 - 60633 | 1 | 1 | 1 |
| 60419 - 60633 | 1 | 1 | 1 |
| 60426 - 60633 | 1 | 1 | 1 |
| 60438 - 60633 | 1 | 1 | 1 |
| 60473 - 60633 | 1 | 1 | 1 |
| 60617 - 60633 | 1 | 1 | 1 |
| 60628 - 60633 | 1 | 0.577073 | 1 |

**Table S22. Pairwise Comparisons of Non-Transfer Significant Stroke Scale Scores by ZIP Code, Age-Adjusted.** Pairwise comparisons were conducted as a follow-up Dunn test with Bonferroni correction for significant Kruskal Wallis stroke scales. Discharge mRS (modified Rankin Score) data is collected upon patient release (Discharge). NIHSS (National Institute of Health Stroke Scale) data is collected upon patient admission (Initial) and release (Discharge).

| **ZIP Code (ZCTA5)** | **Municipality** | **Transfer Patient Count** | **Percent (%)** |
| --- | --- | --- | --- |
| 46303 | Cedar Lake | NA | NA |
| 46304 | Chesterton | 26 | 4.71 |
| 46307 | Crown Point | 17 | 3.08 |
| 46310 | Demotte | 2 | 0.36 |
| 46311 | Dyer | 13 | 2.36 |
| 46312 | East Chicago | 31 | 5.62 |
| 46319 | Griffith | 5 | 0.91 |
| 46320 | Hammond | 3 | 0.54 |
| 46321 | Munster | 6 | 1.09 |
| 46322 | Highland | 3 | 0.54 |
| 46323 | Hammond | 8 | 1.45 |
| 46324 | Hammond | 4 | 0.72 |
| 46327 | Hammond | 3 | 0.54 |
| 46341 | Hebron | 8 | 1.45 |
| 46342 | Hobart | 50 | 9.06 |
| 46347 | Kouts | 6 | 1.09 |
| 46350 | La Porte | 47 | 8.51 |
| 46356 | Lowell | 2 | 0.36 |
| 46360 | Michigan City | 34 | 6.16 |
| 46366 | North Judson | 5 | 0.91 |
| 46368 | Portage | 46 | 8.33 |
| 46373 | St. John | 6 | 1.09 |
| 46375 | Schererville | 12 | 2.17 |
| 46383 | Valparaiso | 26 | 4.71 |
| 46385 | Valparaiso | 38 | 6.88 |
| 46394 | Whiting | 17 | 3.08 |
| 46402 | Gary | 3 | 0.54 |
| 46403 | Gary | 8 | 1.45 |
| 46404 | Gary | 4 | 0.72 |
| 46405 | Lake Station | 22 | 3.99 |
| 46406 | Gary | 4 | 0.72 |
| 46407 | Gary | 3 | 0.54 |
| 46408 | Gary | 7 | 1.27 |
| 46409 | Gary | NA | NA |
| 46410 | Merrillville | 16 | 2.90 |
| 46534 | Knox | 15 | 2.72 |
| 60409 | Calumet City | 10 | 1.81 |
| 60411 | Chicago Heights | 14 | 2.54 |
| 60417 | Crete | 6 | 1.09 |
| 60419 | Dolton | 4 | 0.72 |
| 60426 | Harvey | NA | NA |
| 60438 | Lansing | 5 | 0.91 |
| 60473 | South Holland | 2 | 0.36 |
| 60617 | Chicago | 8 | 1.45 |
| 60628 | Chicago | 2 | 0.36 |
| 60633 | Chicago | 1 | 0.18 |

**Table S23. Descriptive Statistics of Transfer Patients by ZIP Code.** Includes patients who meet the following criteria: 1) they were transferred from another hospital, and 2) they are residents of any of the 43 ZIP Codes described in the Expanded Analysis.
